# Supplementary material for: Validation of a Bioanalytical Method for the Determination of Synthetic and Natural Cannabinoids (New Psychoactive Substances) in Oral Fluid Samples by Means of HPLC-MS/MS
Source: Front Chem. 2020 Jun 5;8:439. doi: 10.3389/fchem.2020.00439 (PMC7325870; doi:10.3389/fchem.2020.00439)
Supplement: Supplementary file 1 [file Data_Sheet_1.XLSX]

## Sheet: EXP denaturation
Sample Name		IS	AM2201	CBD	CBN	C7	C8	HU211	JWH 019	JWH 081	JWH 081	JWH122	JWH200	JWH250	MEPH	THC	THCCOOH	UR144
A_B_1_0	0	102000	568	1590	3850	1340	4202	21300	14700	1000	1000	2810	87400	259000	3180	1410	1300	3660
A_B_1_1	1	118000	233000	5390	13300	1800	5077	9100	323000	286000	286000	354000	107000	313000	148000	5900	2900	97200
A_B_1_2	5	104000	905000	20100	36300	2290	7870	22600	1220000	1390000	1390000	1290000	392000	988000	692000	21300	16000	347000
A_B_1_3	10	99000	1820000	42300	72500	2940	9970	44100	2400000	2670000	2670000	2580000	846000	1990000	1470000	43000	32000	688000
A_B_1_4	20	136000	5350000	127000	180000	6270	11700	109000	6930000	7660000	7660000	7760000	2200000	5840000	3320000	131000	64000	2090000
A_B_1_5	50	79500	6720000	164000	263000	14200	17500	153000	9310000	10700000	10700000	10100000	3800000	7040000	7580000	177000	157000	2600000
A_B_1_6	100	65800	11400000	305000	481000	22100	26000	278000	15300000	17700000	17700000	17400000	6470000	11200000	13400000	298000	278000	4430000
A_B_2_0	0	113000	10800	1080	1120	1090	6960	2780	18500	22500	22500	19100	7130	23900	7810	851	720	4200
A_B_2_1	1	127000	226000	6390	13000	1790	5290	8510	282000	286000	286000	284000	89900	251000	134000	5660	2900	90400
A_B_2_2	5	129000	997000	20800	44400	1980	11900	19800	1210000	1180000	1180000	1330000	403000	1090000	603000	22300	15000	378000
A_B_2_3	10	124000	2200000	45200	90500	2730	8790	41000	2640000	2670000	2670000	2860000	843000	2210000	1340000	44900	31000	817000
A_B_2_4	20	151000	5330000	132000	238000	8120	12600	101000	6820000	7070000	7070000	7570000	2070000	5490000	3120000	127000	63000	2160000
A_B_2_5	50	86600	7850000	171000	329000	11600	15300	145000	9700000	9960000	9960000	10300000	3540000	7820000	6630000	185000	139000	3010000
A_B_2_6	100	94600	14000000	359000	704000	24200	27200	317000	18700000	19000000	19000000	20800000	7070000	14800000	12600000	403000	283000	6140000
A_B_3_0	0	121000	7850	1190	2100	1170	7410	5860	17400	12100	12100	14100	6120	13300	5610	729	1400	3640
A_B_3_1	1	137000	230000	6180	10300	1750	9090	8870	275000	248000	248000	302000	87800	243000	125000	5410	3500	89700
A_B_3_2	5	144000	1120000	26400	48900	3160	8170	25100	1350000	1210000	1210000	1450000	426000	1170000	641000	25300	16000	421000
A_B_3_3	10	140000	2360000	51400	103000	4230	9830	48800	2760000	2610000	2610000	2980000	861000	2370000	1320000	54700	30000	883000
A_B_3_4	20	156000	5160000	112000	236000	9000	15400	103000	6700000	6140000	6140000	7420000	2110000	5380000	3060000	132000	68000	2050000
A_B_3_5	50	140000	11700000	255000	498000	17300	26900	238000	14300000	13300000	13300000	15900000	4610000	11200000	6880000	284000	178000	4600000
A_B_3_6	100	142000	21000000	625000	1120000	35000	44800	509000	25100000	24800000	24800000	28200000	8770000	20200000	12900000	637000	323000	8530000
A_B_4_0	0	116000	11200	3010	831	1090	6050	2330	21200	20500	20500	21100	2870	15100	4480	2360	690	4480
A_B_4_1	1	133000	210000	5350	10400	984	11000	5440	220000	215000	215000	245000	62300	208000	130000	5620	2400	75100
A_B_4_2	5	131000	921000	23900	37400	2930	9520	19700	1020000	986000	986000	1130000	293000	983000	634000	24700	11000	359000
A_B_4_3	10	123000	1940000	40800	82300	3630	10200	41200	2200000	2080000	2080000	2370000	617000	2010000	1300000	52100	27000	737000
A_B_4_4	20	136000	4580000	101000	184000	7340	15700	94000	5300000	5260000	5260000	5630000	1500000	4720000	2970000	123000	45000	1820000
A_B_4_5	50	135000	10300000	216000	474000	18600	22800	208000	11800000	12200000	12200000	13300000	3510000	10000000	7040000	291000	136000	4100000
A_B_4_6	100	143000	18900000	502000	1050000	34900	40100	460000	21700000	21700000	21700000	24300000	6950000	19500000	13200000	619000	272000	7880000
A_B_5_0	0	120000	9040	1040	3390	2130	13700	2370	18600	13000	13000	17100	3030	15800	3680	599	540	4320
A_B_5_1	1	137000	220000	4920	10800	1620	11500	3520	220000	223000	223000	246000	80800	234000	127000	5780	2800	76200
A_B_5_2	5	131000	1040000	21800	40200	3430	8220	19300	1080000	1040000	1040000	1220000	350000	1060000	615000	22500	13000	366000
A_B_5_3	10	132000	2150000	49700	84000	4650	12000	32200	2320000	2200000	2200000	2550000	814000	2120000	1330000	49100	23000	787000
A_B_5_4	20	141000	5130000	104000	215000	7850	15500	90700	5420000	5390000	5390000	6110000	1910000	4850000	2980000	123000	48000	1840000
A_B_5_5	50	140000	11200000	259000	497000	17600	24200	227000	12700000	13300000	13300000	13800000	4290000	11100000	7040000	310000	149000	4320000
A_B_5_6	100	150000	21000000	588000	944000	34700	41100	452000	22500000	23900000	23900000	26700000	8440000	20600000	14000000	636000	280000	8270000
A_B_6_0	0	120000	8550	748	2770	1040	10900	2650	14200	12200	12200	15600	1890	13200	5740	856	820	2210
A_B_6_1	1	130000	214000	3700	11800	1140	8690	3370	235000	226000	226000	254000	72800	229000	129000	6130	2400	83500
A_B_6_2	5	141000	1010000	22300	42300	2020	11800	21100	1080000	1090000	1090000	1200000	361000	1020000	620000	25800	14000	381000
A_B_6_3	10	143000	2090000	50100	79300	3910	10700	42300	2300000	2300000	2300000	2720000	774000	2210000	1350000	55000	24000	801000
A_B_6_4	20	152000	5180000	104000	220000	8010	16400	92100	5670000	5760000	5760000	6190000	1900000	4990000	3050000	126000	48000	1860000
A_B_6_5	50	158000	11600000	271000	472000	15800	22300	233000	12300000	12900000	12900000	14700000	4460000	11200000	7130000	316000	141000	4390000
A_B_6_6	100	159000	21100000	540000	1070000	35100	40700	499000	23500000	24900000	24900000	26200000	8810000	20900000	13700000	668000	280000	8240000
A_C_1_0	0	76900	10570	601	3590	2180	7100	2530	11900	11500	11500	12900	5550	14500	2900	566	7680	2340
A_C_1_1	1	97300	167000	3510	8190	666	5880	6330	213000	199000	199000	219000	63100	176000	92900	3800	11500	64000
A_C_1_2	5	100000	754000	21000	37500	1090	13700	15500	951000	991000	991000	1030000	310000	840000	445000	19300	10600	302000
A_C_1_3	10	104000	1520000	41700	67900	3670	6730	34900	2110000	2050000	2050000	2280000	628000	1730000	954000	36700	23700	647000
A_C_1_4	20	100000	3700000	93600	160000	6900	11900	72800	4680000	5060000	5060000	5170000	1500000	3720000	2080000	94900	64000	1500000
A_C_1_5	50	108200	8160000	201000	365000	14400	22800	150000	10800000	12000000	12000000	11800000	3430000	8250000	4980000	211000	122000	3440000
A_C_1_6	100	113000	17500000	475000	815000	26700	33000	326000	19800000	21400000	21400000	22800000	6480000	16400000	9620000	433000	261000	6830000
A_C_2_0	0	81600	8980	1420	1220	630	4910	3445	17450	13500	13500	13400	5460	15500	10850	1002	6935	4025
A_C_2_1	1	88900	126000	4070	8580	965	6110	5935	207000	187000	187000	220000	62300	175500	90600	3580	11050	64000
A_C_2_2	5	103200	714000	17100	33700	1230	4755	16000	875000	863000	863000	965000	288000	796500	411000	19000	10300	279000
A_C_2_3	10	104000	1540000	36900	72700	3020	10425	29000	1990000	1860000	1860000	2160000	603000	1670000	882000	37700	27550	612000
A_C_2_4	20	92200	3570000	90600	150000	5740	7055	65800	4500000	4490000	4490000	4960000	1440000	3890000	2020000	97700	59900	1410000
A_C_2_5	50	109300	8670000	193000	357000	12000	19000	153000	10600000	10500000	10500000	11400000	3290000	8170000	4730000	210000	115000	3300000
A_C_2_6	100	111000	16600000	414000	821000	28000	29350	328000	19600000	18900000	18900000	21100000	6280000	15900000	9190000	446000	240000	6510000
A_C_3_0	0	86300	10280	460	2890	503	11900	3560	10800	9110	9110	12300	4730	16500	1610	855	6840	3140
A_C_3_1	1	85400	135000	3810	8520	745	7750	7630	186000	152000	152000	196000	62200	164000	82700	4390	9910	57000
A_C_3_2	5	99700	718000	16900	32800	2310	7620	15100	905000	763000	763000	942000	292000	751000	414000	19900	10100	284000
A_C_3_3	10	99700	1470000	32800	70000	2840	14000	34000	1960000	1690000	1690000	2040000	569000	1610000	885000	35400	25900	643000
A_C_3_4	20	95500	3410000	87900	173000	7040	13700	71500	4620000	4050000	4050000	5020000	1460000	3720000	1960000	91400	54700	1430000
A_C_3_5	50	108000	8370000	213000	400000	14200	15500	157000	10100000	9390000	9390000	11800000	3250000	8310000	4580000	219000	124000	3310000
A_C_3_6	100	112000	17400000	402000	745000	29900	39000	355000	19700000	18600000	18600000	21600000	6580000	15700000	9010000	475000	237000	6630000
A_C_4_0	0	94000	10500	1240	1950	1080	11600	1190	23700	15600	15600	20000	1810	12300	3640	754	690	5070
A_C_4_1	1	95200	147000	4350	5330	1790	6780	3910	156000	147000	147000	164000	45500	150000	88500	3530	2200	47900
A_C_4_2	5	95500	651000	14300	26200	1690	9270	11400	678000	645000	645000	739000	226000	670000	439000	16200	8100	236000
A_C_4_3	10	83300	1350000	30800	53200	2730	13700	22700	1430000	1390000	1390000	1660000	466000	1410000	901000	33100	22000	538000
A_C_4_4	20	94700	3160000	70000	125000	5080	17400	65000	3550000	3580000	3580000	3810000	1070000	3330000	2100000	80900	36000	1250000
A_C_4_5	50	91300	7070000	169000	340000	11500	17900	133000	8100000	8310000	8310000	9100000	2460000	7130000	4740000	194000	104000	2930000
A_C_4_6	100	89700	13300000	350000	672000	19300	32400	300000	14900000	15700000	15700000	17500000	5070000	13900000	9530000	409000	187000	5680000
A_C_5_0	0	78600	12200	1260	2650	2130	10700	1620	19700	17300	17300	18600	1970	14700	1710	618	790	3840
A_C_5_1	1	82600	142000	4850	7260	1790	10800	4320	151000	147000	147000	174000	55900	151000	87800	3960	1900	55500
A_C_5_2	5	83000	680000	14500	26000	1640	6170	12800	692000	695000	695000	769000	257000	680000	403000	14400	12000	247000
A_C_5_3	10	88700	1470000	30400	63100	2730	9600	24200	1530000	1520000	1520000	1660000	537000	1500000	837000	33400	18000	542000
A_C_5_4	20	104900	3530000	74000	150000	4500	11400	62600	3790000	3700000	3700000	4160000	1270000	3330000	2030000	84900	32000	1250000
A_C_5_5	50	95600	7760000	174000	280000	13500	17500	154000	8400000	8770000	8770000	9200000	3110000	7520000	4730000	206000	92000	2950000
A_C_5_6	100	97000	14700000	344000	741000	21600	29500	303000	16400000	16200000	16200000	18200000	6090000	14100000	9290000	423000	199000	5740000
A_C_6_0	0	79100	11100	915	2930	778	7360	1400	19800	16000	16000	18400	2510	17300	3110	545	700	5620
A_C_6_1	1	91000	147000	4680	8450	1340	7070	3870	158000	158000	158000	175000	55500	156000	81000	4660	1900	50700
A_C_6_2	5	88100	683000	13100	30800	2880	17200	12600	720000	705000	705000	793000	250000	713000	411000	16600	10000	253000
A_C_6_3	10	93800	1480000	30500	54300	5330	9180	31100	1560000	1470000	1470000	1750000	528000	1450000	848000	37800	21000	530000
A_C_6_4	20	101000	3390000	73100	153000	6950	15000	65800	3690000	3760000	3760000	4130000	1190000	3430000	2100000	89100	39000	1270000
A_C_6_5	50	101000	8200000	156000	309000	9830	18000	156000	8260000	8760000	8760000	9310000	2930000	7910000	4650000	216000	96000	2880000
A_C_6_6	100	99000	14600000	350000	663000	22200	29400	339000	16900000	17300000	17300000	18700000	5900000	14400000	9130000	429000	189000	5850000
P1_B_1_0	0	88700	5110	508	2190	467	28400	3170	2530	4760	4760	3680	6430	12800	2730	104	1200	1210
P1_B_1_1	1	84800	150000	4360	6830	533	15700	8580	196000	214000	214000	203000	61500	175000	75000	2120	4300	56600
P1_B_1_2	5	83100	697000	18900	33500	2580	11400	19000	973000	989000	989000	1030000	293000	741000	293000	11900	15000	298000
P1_B_1_3	10	103000	1710000	40600	60500	3030	28200	33900	2250000	2250000	2250000	2300000	637000	1820000	669000	40500	35000	678000
P1_B_1_4	20	92500	3700000	89800	133000	6420	16000	72300	4820000	5160000	5160000	5100000	1390000	3840000	1500000	85100	53000	1430000
P1_B_1_5	50	96000	9760000	265000	396000	17400	21500	227000	12800000	14300000	14300000	14300000	4140000	9950000	4370000	265000	158000	4260000
P1_B_1_6	100	86500	15700000	399000	766000	27400	28000	323000	19200000	19500000	19500000	20900000	6520000	15400000	6610000	374000	238000	6500000
P1_B_2_0	0	104000	5860	483	2470	353	7590	2880	14700	8650	8650	10900	4860	14700	4120	812	1500	1650
P1_B_2_1	1	87500	158000	4330	7390	224	8100	7490	193000	207000	207000	207000	61700	173000	62800	4100	920	64200
P1_B_2_2	5	83000	732000	16400	31400	963	7100	19200	950000	892000	892000	1000000	262000	787000	246000	15000	14000	285000
P1_B_2_3	10	96400	1670000	38300	69700	2900	11500	36400	2090000	2100000	2100000	2260000	647000	1790000	519000	32300	24000	654000
P1_B_2_4	20	92900	3790000	90400	173000	6800	26500	70600	4430000	4680000	4680000	5040000	1420000	3940000	1170000	75700	49000	1420000
P1_B_2_5	50	103500	10200000	260000	484000	15900	23900	203000	12500000	13100000	13100000	13300000	4200000	10200000	3260000	211000	157000	4130000
P1_B_2_6	100	82400	15100000	405000	675000	24600	38800	346000	18600000	19500000	19500000	20200000	6530000	14900000	5010000	350000	239000	6250000
P1_B_3_0	0	100000	9010	865	3670	407	6540	3500	15300	13200	13200	14000	6360	15700	4220	746	900	2850
P1_B_3_1	1	90300	160000	3690	8930	935	7580	7440	196000	183000	183000	209000	62700	176000	50900	3700	1700	59900
P1_B_3_2	5	103400	725000	20100	33600	1060	9930	16400	926000	879000	879000	995000	256000	758000	212000	15400	11000	290000
P1_B_3_3	10	107400	1600000	34800	74400	3100	10400	35900	2070000	2080000	2080000	2290000	601000	1710000	439000	33800	21000	632000
P1_B_3_4	20	108500	3710000	86700	168000	5290	11200	71600	4480000	4700000	4700000	4880000	1340000	3920000	994000	74100	44000	1450000
P1_B_3_5	50	105600	10000000	252000	443000	15300	24700	240000	12000000	11800000	11800000	13100000	3950000	10300000	2870000	241000	147000	3970000
P1_B_3_6	100	113000	15700000	420000	768000	25400	32800	362000	17000000	18200000	18200000	19300000	6270000	15200000	4500000	433000	226000	5960000
P1_C_1_0	0	147000	4350	723	2530	1280	7480	2580	5150	6980	6980	8160	3620	14400	2020	315	9980	1380
P1_C_1_1	1	122000	226000	4750	14000	1160	7030	5620	305000	309000	309000	333000	90800	251000	88100	5670	7910	87300
P1_C_1_2	5	135000	1045000	29200	58300	2500	12200	24400	1520000	1470000	1470000	1530000	460000	1160000	397000	27100	14600	422000
P1_C_1_3	10	135000	2460000	59100	111000	3900	10400	48900	3130000	3080000	3080000	3330000	924000	2530000	847000	59200	38500	934000
P1_C_1_4	20	128000	5350000	137000	246000	10600	13500	98100	6740000	7060000	7060000	7130000	2110000	5350000	1930000	119000	87100	2000000
P1_C_1_5	50	100000	9430000	248000	448000	17600	20500	192000	12400000	13800000	13800000	12400000	3990000	10100000	3650000	232000	163000	3710000
P1_C_1_6	100	134000	22200000	591000	1130000	43200	29000	494000	25000000	26900000	26900000	27500000	8770000	20600000	8310000	601000	375000	8700000
P1_C_2_0	0	147000	10350	758	4700	696	8860	2030	9420	10400	10400	12000	3650	18300	2180	852	9390	1760
P1_C_2_1	1	121000	236000	5630	13900	1060	6370	6590	283000	295000	295000	300000	92000	259000	69100	6050	11500	94400
P1_C_2_2	5	129000	1055000	26800	51300	2870	12500	27200	1410000	1380000	1380000	1490000	408000	1180000	353000	25000	14600	417000
P1_C_2_3	10	132000	2350000	54400	112000	4690	9980	48500	3020000	2960000	2960000	3290000	888000	2590000	737000	53200	34600	899000
P1_C_2_4	20	131000	5190000	129000	240000	9270	19300	105000	6610000	6770000	6770000	6910000	2040000	5320000	1700000	114000	79400	1980000
P1_C_2_5	50	100000	9360000	241000	454000	17700	21000	202000	11900000	11900000	11900000	12000000	3920000	9630000	3330000	216000	157000	3700000
P1_C_2_6	100	134000	23200000	562000	1170000	39200	45900	448000	23800000	25900000	25900000	26900000	8900000	21000000	7450000	567000	363000	8130000
P1_C_3_0	0	161000	4940	713	3560	538	4350	956	12400	9800	9800	11100	5270	9780	3500	1020	9110	2050
P1_C_3_1	1	124000	205000	5010	11000	939	6180	7040	287000	269000	269000	276000	88400	277000	77700	6810	9980	84300
P1_C_3_2	5	134000	1065000	23800	51700	2390	13300	28200	1300000	1330000	1330000	1420000	475000	1150000	335000	30900	13200	402000
P1_C_3_3	10	130000	2260000	53700	105000	3700	10300	56000	2900000	2730000	2730000	3170000	885000	2320000	722000	58900	37600	843000
P1_C_3_4	20	133000	4880000	121000	215000	11100	16900	104000	6090000	6270000	6270000	6470000	2010000	5240000	1600000	133000	79800	1890000
P1_C_3_5	50	101000	9380000	233000	448000	17100	23000	224000	11500000	12100000	12100000	12000000	3910000	9380000	3170000	234000	161000	3470000
P1_C_3_6	100	132000	22400000	572000	1090000	40300	54800	543000	24400000	24100000	24100000	26900000	8870000	20100000	7040000	575000	366000	8230000
P2_B_1_0	0	95900	2270	469	4370	688	14100	3960	3660	2440	2450	3970	5740	5520	5520	639	4700	752
P2_B_1_1	1	76700	153000	4110	8350	990	8530	9880	198000	165000	204000	62700	160000	36000	36000	3940	1500	55200
P2_B_1_2	5	88600	716000	15500	31800	1710	7760	19500	885000	796000	964000	273000	763000	170000	170000	16200	12000	281000
P2_B_1_3	10	80000	1430000	30800	66300	3110	18800	33000	1700000	1570000	1830000	544000	1550000	327000	327000	33300	14000	547000
P2_B_1_4	20	66900	3270000	71600	149000	5180	9920	57200	3870000	3480000	4320000	1280000	3620000	751000	751000	64300	29000	1220000
P2_B_1_5	50	80500	7410000	167000	320000	9470	15200	147000	8620000	8250000	9700000	3040000	7820000	1710000	1710000	161000	63000	2850000
P2_B_1_6	100	83600	14900000	374000	753000	26600	26100	308000	18200000	17200000	18800000	5910000	15200000	3370000	3370000	376000	125000	6060000
P2_B_2_0	0	95900	12300	469	4370	688	14100	3960	3660	2440	2440	2450	3970	5740	5520	639	630	752
P2_B_2_1	1	96700	154000	4110	8350	990	8530	9880	198000	165000	165000	204000	62700	160000	36000	3940	950	55200
P2_B_2_2	5	88600	719000	15500	31800	1710	7760	19500	885000	796000	796000	964000	273000	763000	170000	16200	8500	281000
P2_B_2_3	10	80000	1400000	30800	66300	3110	18800	33000	1700000	1570000	1570000	1830000	544000	1550000	327000	33300	20000	547000
P2_B_2_4	20	86900	3360000	71600	149000	5180	9920	57200	3870000	3480000	3480000	4320000	1280000	3620000	751000	64300	38000	1220000
P2_B_2_5	50	80500	7370000	167000	320000	9470	15200	147000	8620000	8250000	8250000	9700000	3040000	7820000	1710000	161000	104000	2850000
P2_B_2_6	100	83600	14400000	374000	753000	26600	26100	308000	18200000	17200000	17200000	18800000	5910000	15200000	3370000	376000	226000	6060000
P2_B_3_0	0	91800	7550	1260	1440	395	7610	3910	19800	15400	15400	22400	5060	15400	6010	1200	760	4990
P2_B_3_1	1	97500	157000	5790	6890	1310	10600	7800	190000	169000	169000	210000	61600	179000	35100	3320	2200	58800
P2_B_3_2	5	87000	719000	15500	35700	2360	17700	15000	813000	716000	716000	906000	283000	777000	160000	14300	7500	271000
P2_B_3_3	10	89100	1470000	34400	57600	2990	11100	33200	1700000	1440000	1440000	1830000	582000	1470000	296000	30800	21000	544000
P2_B_3_4	20	89000	3260000	74100	145000	5170	22200	65300	3920000	3420000	3420000	3950000	1250000	3510000	705000	66900	43000	1250000
P2_B_3_5	50	88100	7370000	158000	322000	11600	18100	136000	8430000	7640000	7640000	9400000	2930000	7830000	1630000	155000	117000	2700000
P2_B_3_6	100	87700	14300000	368000	730000	21600	32400	325000	17500000	15700000	15700000	19100000	5850000	14900000	3140000	380000	217000	6010000
P2_C_1_0	0	136000	10160	1070	1170	539	7150	3830	10300	6030	6030	8230	3950	10500	2900	729	6940	2150
P2_C_1_1	1	101000	190000	5490	11700	983	4710	10500	261000	222000	222000	277000	76100	225000	54600	4810	10800	69100
P2_C_1_2	5	134000	910000	22200	52400	2870	10800	22500	1050000	1130000	1130000	1410000	385000	1110000	255000	24400	17400	375000
P2_C_1_3	10	110000	1820000	40900	90600	3230	10100	44800	2360000	2200000	2200000	2700000	774000	2080000	561000	44800	36600	710000
P2_C_1_4	20	106000	4250000	102000	202000	7050	16200	87200	5540000	4850000	4850000	5930000	1820000	4710000	1330000	98200	77100	1620000
P2_C_1_5	50	112000	9510000	234000	457000	17000	18800	216000	11300000	10600000	10600000	12900000	4260000	10200000	2990000	250000	175000	3530000
P2_C_1_6	100	83200	16100000	355000	642000	26100	26800	370000	16800000	16100000	16100000	18500000	7770000	15600000	5670000	412000	333000	5570000
P2_C_2_0	0	132000	10630	704	3010	958	17700	4760	12100	9540	9540	12900	3510	10500	3810	903	11000	4870
P2_C_2_1	1	102000	168000	5940	11000	1133	4620	10900	247000	209000	209000	267000	78200	225000	53700	4850	10200	73300
P2_C_2_2	5	120000	836000	22300	47100	2600	12600	22000	1020000	1030000	1030000	1350000	382000	1110000	252000	24100	13400	368000
P2_C_2_3	10	107000	1830000	43200	93200	3570	9250	39500	2370000	1990000	1990000	2620000	775000	2080000	553000	42200	33400	698000
P2_C_2_4	20	104300	4310000	97400	195000	5810	20800	82200	5260000	4530000	4530000	5780000	1910000	4710000	1300000	95100	69100	1550000
P2_C_2_5	50	104300	9420000	224000	462000	15800	17600	189000	11300000	9990000	9990000	12500000	4100000	10200000	2910000	196000	154000	3730000
P2_C_2_6	100	88800	16200000	348000	695000	24900	40200	323000	17100000	16300000	16300000	18600000	7850000	15600000	5900000	366000	345000	5590000
P2_C_3_0	0	145000	14450	935	279	296	8450	5540	11400	7820	7820	13100	3120	11700	5060	609	8770	1760
P2_C_3_1	1	108000	176000	4520	10000	1420	6480	9780	245000	210000	210000	258000	77600	215000	53200	5250	14500	68200
P2_C_3_2	5	142000	951000	22500	43100	3680	13700	22200	1000000	1100000	1100000	1380000	379000	1020000	255000	26200	17100	355000
P2_C_3_3	10	103000	1840000	45100	78000	3090	10700	42900	2300000	2060000	2060000	2570000	815000	2020000	553000	46800	39000	732000
P2_C_3_4	20	109000	4250000	91600	166000	7360	17400	98600	5080000	4610000	4610000	5730000	1850000	4750000	1240000	109000	74100	1590000
P2_C_3_5	50	120000	9320000	214000	361000	16100	17800	217000	10700000	10200000	10200000	12500000	4230000	10200000	2830000	249000	165000	3620000
P2_C_3_6	100	82900	16400000	366000	693000	25300	28300	363000	16900000	16300000	16300000	17700000	7910000	15900000	5890000	363000	326000	5640000
P3_B_1_0	0	89700	1670	499	2490	1510	8560	3510	3430	2250	2250	2520	1810	11700	4920	432	830	928
P3_B_1_1	1	89300	160000	4250	9940	436	13300	9190	210000	171000	171000	215000	59400	224000	39300	5390	2100	68900
P3_B_1_2	5	90800	964000	18200	41500	1020	15300	24800	1200000	1000000	1000000	1250000	367000	1090000	208000	21500	9500	386000
P3_B_1_3	10	98000	1600000	34300	77000	2260	11900	36100	1860000	1690000	1690000	2040000	535000	2070000	314000	41500	17000	617000
P3_B_1_4	20	82500	3340000	73300	144000	5680	10800	68600	3940000	3480000	3480000	4330000	1230000	4640000	735000	80800	35000	1300000
P3_B_1_5	50	84000	8020000	181000	361000	13300	21300	152000	9230000	7980000	7980000	10500000	3040000	10100000	1700000	203000	112000	3100000
P3_B_1_6	100	82200	14200000	330000	700000	20400	33000	294000	16200000	14300000	14300000	17700000	5680000	16200000	3260000	342000	203000	5510000
P3_B_2_0	0	97400	6370	909	1940	409	10500	4290	13700	9540	9540	11900	6430	7490	3990	1010	570	2600
P3_B_2_1	1	81400	167000	3840	9600	1010	9400	7130	196000	158000	158000	208000	61200	180000	43700	5030	1400	63200
P3_B_2_2	5	96800	937000	19400	40100	1920	7350	21600	1120000	996000	996000	1240000	371000	1000000	211000	21000	7600	365000
P3_B_2_3	10	90200	1560000	34300	69600	2600	9220	31200	1890000	1620000	1620000	2070000	561000	1660000	308000	33900	17000	645000
P3_B_2_4	20	89500	3300000	74200	137000	5660	12200	62100	3980000	3490000	3490000	4160000	1190000	3440000	732000	77000	34000	1320000
P3_B_2_5	50	86800	7970000	165000	373000	12300	17900	151000	9330000	8050000	8050000	10500000	3170000	8100000	1690000	181000	125000	3210000
P3_B_2_6	100	75500	12800000	333000	699000	19200	29300	281000	16200000	15700000	15700000	18200000	5500000	14000000	3280000	333000	199000	5610000
P3_B_3_0	0	82200	6890	875	3030	619	12200	5510	12900	8900	8900	12400	3310	10700	1860	404	540	2360
P3_B_3_1	1	88300	166000	3440	9600	1180	10800	8180	193000	163000	163000	204000	60100	172000	39800	4150	2300	60100
P3_B_3_2	5	94700	965000	18400	46900	2130	19500	18700	1110000	955000	955000	1290000	348000	1010000	212000	25300	7000	360000
P3_B_3_3	10	97000	1550000	32000	70000	3340	12100	33600	1950000	1610000	1610000	2130000	530000	1610000	288000	36000	14000	606000
P3_B_3_4	20	82000	3170000	71200	140000	5560	19600	61900	3960000	3440000	3440000	4250000	1210000	3410000	678000	72000	34000	1210000
P3_B_3_5	50	84300	8120000	170000	349000	11500	16100	157000	9030000	8500000	8500000	10400000	2970000	8070000	1580000	179000	120000	3160000
P3_B_3_6	100	81900	13700000	333000	672000	22100	27800	258000	15800000	15400000	15400000	18400000	5570000	14000000	2990000	341000	193000	5250000
P3_C_1_0	0	122000	4570	704	2030	692	9090	4290	10800	8600	8600	9920	5030	8100	2120	574	5580	1980
P3_C_1_1	1	125000	212000	5540	11500	984	5810	6500	271000	221000	221000	308000	85400	238000	64800	5180	7020	90800
P3_C_1_2	5	111000	955000	17800	42800	2880	17700	25600	1130000	909000	909000	1130000	378000	1020000	301000	23000	13600	354000
P3_C_1_3	10	114000	1880000	42100	80700	3640	9850	41300	2330000	1850000	1850000	2510000	796000	2060000	593000	50400	35200	704000
P3_C_1_4	20	114000	4620000	91400	183000	5750	16000	93200	5000000	4520000	4520000	5840000	1770000	4500000	1440000	110000	67300	1670000
P3_C_1_5	50	129000	12670000	261000	535000	20700	27400	241000	11000000	9800000	9800000	12500000	4380000	11600000	3310000	224000	159000	3400000
P3_C_1_6	100	120000	16900000	347000	773000	23700	25100	357000	17600000	18300000	18300000	19600000	6580000	14800000	4890000	389000	271000	5690000
P3_C_2_0	0	125000	5040	800	1530	306	9010	3510	9680	8610	8610	11800	1900	10600	1900	465	5640	2170
P3_C_2_1	1	112000	193000	5340	11600	729	4940	7380	280000	221000	221000	285000	80700	235000	68600	4890	8710	96400
P3_C_2_2	5	104100	972000	18500	42000	2160	6410	20900	1130000	909000	909000	1140000	371000	1040000	296000	18400	14200	361000
P3_C_2_3	10	113000	2030000	36700	86500	3400	9230	36900	2210000	1910000	1910000	2490000	778000	1930000	611000	39700	28300	694000
P3_C_2_4	20	109500	4560000	91300	188000	5860	15400	101400	4940000	4280000	4280000	5860000	1740000	4550000	1410000	90800	58100	1720000
P3_C_2_5	50	124000	12780000	240000	565000	18500	24000	221000	10400000	9700000	9700000	12300000	4330000	12300000	3230000	207000	156000	3360000
P3_C_2_6	100	117800	16000000	365000	747000	24700	28900	318000	16900000	17200000	17200000	20700000	6410000	14600000	5030000	380000	251000	5510000
P3_C_3_0	0	133000	7270	1110	2170	1130	9730	3850	11200	7590	7590	10900	4010	10000	3080	495	3360	2190
P3_C_3_1	1	122000	210000	4830	10000	668	4890	5810	291000	231000	231000	296000	80500	226000	68600	5340	8100	90300
P3_C_3_2	5	112000	948000	16300	34900	2300	14100	25600	1090000	915000	915000	1140000	365000	984000	280000	22000	14200	340000
P3_C_3_3	10	105000	1650000	36100	83100	3750	9370	45700	2340000	2050000	2050000	2710000	633000	1600000	562000	39900	40000	766000
P3_C_3_4	20	93000	3630000	70800	195000	6030	22700	109000	5270000	4530000	4530000	5700000	1490000	3500000	1260000	105000	61700	1710000
P3_C_3_5	50	106000	10170000	231000	707000	22200	28800	201000	9300000	9100000	9100000	11900000	4230000	9600000	3090000	219000	158000	3700000
P3_C_3_6	100	106000	13800000	300000	1040000	28900	42700	352000	20000000	17100000	17100000	21400000	4880000	12900000	4740000	440000	212000	6370000
P4_B_1_0	0	89200	8320	518	2700	1000	11000	1290	11700	11400	11400	11200	1670	11900	3150	242	670	4040
P4_B_1_1	1	78300	131000	2660	8210	2180	10900	5120	152000	147000	147000	168000	47400	148000	20800	3300	2200	52600
P4_B_1_2	5	72100	596000	10600	27000	3170	14500	15500	670000	641000	641000	709000	201000	653000	71900	14500	8200	235000
P4_B_1_3	10	79100	1370000	28200	65500	2760	17800	28300	1550000	1490000	1490000	1730000	464000	1440000	152000	33500	20000	547000
P4_B_1_4	20	68200	2730000	56500	134000	4250	7810	52300	3130000	3090000	3090000	3470000	937000	2860000	394000	71600	39000	1130000
P4_B_1_5	50	74100	6570000	170000	287000	10900	20700	119000	7320000	7200000	7200000	8290000	2190000	6800000	750000	168000	94000	2730000
P4_B_1_6	100	74300	12600000	319000	625000	23500	24900	277000	14600000	14900000	14900000	16800000	4920000	12700000	1360000	359000	196000	5450000
P4_B_2_0	0	86700	8090	2160	750	531	13600	1250	14400	13100	13100	15400	1380	13500	2320	201	970	2640
P4_B_2_1	1	61800	143000	3120	6600	1370	13100	4640	150000	162000	162000	178000	47800	155000	21400	2570	1500	52500
P4_B_2_2	5	70700	641000	13600	26100	1790	17200	13700	678000	688000	688000	775000	227000	621000	70500	13100	7000	240000
P4_B_2_3	10	82300	1480000	33400	61300	3130	15200	29500	1600000	1550000	1550000	1750000	482000	1500000	143000	31200	18000	552000
P4_B_2_4	20	68900	2970000	59700	111000	5680	12800	52700	3090000	3200000	3200000	3530000	996000	2950000	364000	56500	33000	1060000
P4_B_2_5	50	83100	6960000	152000	260000	11900	19900	131000	7840000	7910000	7910000	8970000	2420000	7090000	702000	183000	105000	2660000
P4_B_2_6	100	83100	14200000	329000	664000	23300	34300	294000	15100000	15500000	15500000	17400000	5200000	13900000	1250000	369000	185000	5230000
P4_B_3_0	0	87800	7170	1590	1510	1300	13700	1920	15300	10200	10200	13300	2790	13100	3740	279	630	3800
P4_B_3_1	1	89800	136000	3000	6800	2140	4470	4570	158000	157000	157000	168000	44000	150000	17300	3340	1800	49800
P4_B_3_2	5	82900	653000	15600	25400	2390	16500	14300	689000	675000	675000	767000	226000	658000	64700	17400	16000	227000
P4_B_3_3	10	76500	1500000	28500	59500	3680	12600	28400	1610000	1600000	1600000	1760000	504000	1420000	129000	33000	18000	548000
P4_B_3_4	20	85700	2920000	61600	120000	5030	7400	55800	3160000	3180000	3180000	3550000	992000	2630000	345000	63500	37000	1070000
P4_B_3_5	50	73100	7140000	155000	286000	12200	21900	142000	7380000	7730000	7730000	8720000	2570000	7000000	668000	151000	96000	2590000
P4_B_3_6	100	77200	14100000	320000	589000	21800	38200	306000	14900000	16300000	16300000	17000000	5300000	13400000	1150000	326000	190000	5320000
P4_C_1_0	0	128000	8410	1040	2290	524	7690	1720	12400	11800	11800	10800	626	11600	2900	1150	11400	2350
P4_C_1_1	1	109000	191000	5400	6940	1470	6320	5150	216000	205000	205000	240000	61800	194000	56600	5230	10500	69800
P4_C_1_2	5	119000	840000	19400	38900	2540	5490	19000	1010000	996000	996000	1150000	316000	853000	255000	24300	16200	324000
P4_C_1_3	10	109000	1880000	43500	81100	4050	16300	41500	2200000	2060000	2060000	2450000	668000	1800000	538000	42700	28700	681000
P4_C_1_4	20	116000	4450000	93200	272000	5360	37200	95000	4160000	4820000	4820000	4670000	1530000	4320000	1160000	105000	56300	1270000
P4_C_1_5	50	104000	9640000	217000	465000	16400	29500	236000	10300000	9960000	9960000	11000000	3470000	9010000	2540000	235000	133000	3420000
P4_C_1_6	100	122000	19800000	485000	972000	34600	37500	390000	21400000	21200000	21200000	24300000	6720000	18700000	5280000	469000	290000	7120000
P4_C_2_0	0	130000	9550	396	1390	1710	8230	2420	11300	9060	9060	11000	2130	8690	4490	667	7590	2040
P4_C_2_1	1	103000	207000	4730	8800	1797	6450	5800	223000	227000	227000	241000	73200	199000	57300	4390	9210	69800
P4_C_2_2	5	118000	884000	18600	43200	2090	8970	18500	1010000	1080000	1080000	1200000	329000	913000	231000	24100	13500	324000
P4_C_2_3	10	119000	2000000	42400	79900	3440	15000	40800	2190000	2300000	2300000	2530000	685000	1940000	509000	48300	31500	732000
P4_C_2_4	20	117000	4450000	90300	189000	7840	19200	110000	5100000	5020000	5020000	5560000	1570000	4330000	1100000	103000	57000	1630000
P4_C_2_5	50	111000	10070000	245000	410000	16900	26900	201000	10900000	11600000	11600000	11600000	3450000	9420000	2530000	227000	141000	3640000
P4_C_2_6	100	123000	20800000	485000	942000	35700	43200	443000	21700000	22200000	22200000	24100000	7070000	18100000	5150000	544000	268000	7370000
P4_C_3_0	0	131000	5500	72.5	1950	1530	10500	3230	11700	9810	9810	8860	2540	10400	4230	541	8680	2220
P4_C_3_1	1	109000	201000	4360	9410	2150	5680	4620	229000	216000	216000	254000	71200	201000	54500	5270	8000	72300
P4_C_3_2	5	119000	874000	22800	43600	1930	8810	20000	1020000	1090000	1090000	1190000	332000	919000	242000	24500	13000	336000
P4_C_3_3	10	109000	1850000	38600	90300	3840	12300	43300	2310000	2170000	2170000	2610000	672000	1960000	518000	50900	36800	747000
P4_C_3_4	20	116000	4240000	102000	206000	6170	13500	98000	5150000	4950000	4950000	5670000	1500000	4300000	1140000	117000	67400	1600000
P4_C_3_5	50	105000	9650000	210000	467000	21400	25100	211000	10700000	11400000	11400000	11600000	3410000	9230000	2520000	276000	141000	3590000
P4_C_3_6	100	131000	20600000	486000	961000	31500	39200	473000	21600000	22100000	22100000	24300000	7090000	18400000	5230000	598000	292000	7350000
P5_B_1_0	0	81100	7620	728	1920	2410	14200	3770	11900	10500	10500	11300	2110	10400	6340	1070	740	3130
P5_B_1_1	1	85800	147000	3880	6080	1590	8900	4770	165000	150000	150000	181000	50000	159000	27800	3290	1500	56900
P5_B_1_2	5	74600	581000	14000	29100	2860	12400	13900	672000	673000	673000	770000	218000	650000	108000	14400	11000	238000
P5_B_1_3	10	82000	1410000	28000	53900	2990	12600	28400	1480000	1440000	1440000	1630000	496000	1430000	229000	32700	26000	533000
P5_B_1_4	20	83400	2870000	59500	122000	6020	15900	56900	3090000	3100000	3100000	3540000	1010000	3060000	516000	64500	35000	1120000
P5_B_1_5	50	90500	7370000	163000	309000	11400	21000	149000	7900000	8270000	8270000	9260000	2460000	7170000	1210000	188000	88000	2810000
P5_B_1_6	100	87500	13000000	289000	598000	20600	30500	265000	14000000	13800000	13800000	15400000	4810000	13100000	2340000	351000	180000	4830000
P5_B_2_0	0	73400	7720	490	3480	910	14200	1070	12700	10300	10300	11900	2560	13100	3570	550	610	2240
P5_B_2_1	1	81900	150000	3730	7950	1540	8450	3640	166000	140000	140000	177000	47500	150000	24400	4050	1800	54100
P5_B_2_2	5	70200	592000	13300	26900	1020	12700	14400	675000	661000	661000	737000	206000	628000	106000	12500	4300	240000
P5_B_2_3	10	70500	1370000	28900	60600	3510	11000	30600	1440000	1450000	1450000	1670000	497000	1370000	223000	33000	14000	530000
P5_B_2_4	20	64900	2820000	63400	106000	6360	11100	50100	3210000	3060000	3060000	3390000	1010000	2860000	493000	61600	32000	1110000
P5_B_2_5	50	77400	7500000	152000	311000	9770	23600	144000	7970000	8120000	8120000	8850000	2490000	7080000	1160000	177000	89000	2860000
P5_B_2_6	100	69400	13000000	287000	577000	21200	31100	282000	14600000	14300000	14300000	16500000	4950000	13300000	2220000	305000	169000	4940000
P5_B_3_0	0	71500	8920	567	2440	2010	8220	2050	11000	10800	10800	11000	2020	10300	2430	739	780	3190
P5_B_3_1	1	83900	141000	2630	6890	2090	10200	4490	160000	162000	162000	164000	50500	161000	23700	4050	1600	54100
P5_B_3_2	5	79300	630000	14600	26200	2960	14100	13100	700000	666000	666000	763000	223000	608000	101000	11900	15000	229000
P5_B_3_3	10	78000	1350000	27200	56600	2550	16100	27100	1540000	1470000	1470000	1690000	473000	1460000	207000	31500	19000	512000
P5_B_3_4	20	76800	2830000	60000	126000	4110	11700	59000	3080000	3040000	3040000	3480000	997000	2990000	495000	72400	34000	1100000
P5_B_3_5	50	84800	7450000	150000	343000	10300	16200	146000	8240000	7980000	7980000	9040000	2460000	7300000	1120000	186000	85000	2850000
P5_B_3_6	100	78100	13100000	314000	557000	18900	20400	255000	13900000	14200000	14200000	15900000	4940000	12900000	2200000	321000	176000	5050000
P5_C_1_0	0	135000	9200	909	1380	676	11200	2260	11500	8060	8060	12000	1400	8970	3860	584	8410	3190
P5_C_1_1	1	114000	187000	5010	9390	1590	8510	6790	197000	212000	212000	241000	71200	210000	50000	4400	8200	70400
P5_C_1_2	5	109000	906000	15600	31900	3620	11700	20000	958000	900000	900000	1060000	341000	973000	225000	19700	14000	319000
P5_C_1_3	10	117000	1830000	38500	74100	4050	8910	37200	2040000	2020000	2020000	2330000	628000	1950000	438000	45100	26800	687000
P5_C_1_4	20	94100	3730000	84700	171000	8380	14600	78500	4010000	4120000	4120000	4640000	1480000	4100000	978000	85600	51700	1410000
P5_C_1_5	50	117000	9900000	242000	446000	15700	22500	222000	10900000	11300000	11300000	13000000	3500000	9990000	2490000	256000	130000	3690000
P5_C_1_6	100	94700	17000000	342000	729000	26700	30900	338000	16400000	17600000	17600000	19200000	6520000	16600000	4650000	420000	248000	5930000
P5_C_2_0	0	128000	10940	1020	1680	2480	12400	1500	3380	8190	8190	9260	1590	10200	2590	429	6850	2640
P5_C_2_1	1	114900	188000	4230	9110	1280	9290	6870	220000	207000	207000	238000	70800	210000	48200	4760	8590	72300
P5_C_2_2	5	98500	812000	17500	31500	2650	10200	18900	947000	960000	960000	1040000	327000	928000	226000	17500	11100	329000
P5_C_2_3	10	107200	1790000	39800	80000	4480	10200	38500	2140000	2100000	2100000	2330000	683000	1930000	438000	44000	23700	682000
P5_C_2_4	20	94500	3760000	84700	157000	6500	17500	81000	4190000	4270000	4270000	4780000	1400000	3910000	966000	89100	56100	1400000
P5_C_2_5	50	124000	10370000	233000	478000	16500	21900	224000	10700000	11400000	11400000	13400000	3720000	10000000	2440000	257000	133000	3750000
P5_C_2_6	100	94100	17000000	381000	655000	26000	36000	338000	17000000	18200000	18200000	20200000	6470000	17000000	4710000	445000	236000	6180000
P5_C_3_0	0	132000	10660	1080	1530	1270	9910	2370	10200	9050	9050	9440	2240	9980	2690	491	9410	1740
P5_C_3_1	1	112000	169000	3700	10400	1320	9320	5460	207000	205000	205000	238000	72200	215000	47400	4350	7600	71800
P5_C_3_2	5	104000	825000	17700	43200	2880	7280	16900	920000	931000	931000	1090000	337000	898000	215000	22600	12200	323000
P5_C_3_3	10	109000	1700000	36800	81400	4510	9930	39100	2040000	2020000	2020000	2300000	678000	1960000	409000	45700	34700	697000
P5_C_3_4	20	95300	3910000	81000	162000	6720	10700	78500	4070000	4260000	4260000	4890000	1450000	4030000	951000	93700	62300	1410000
P5_C_3_5	50	122000	10180000	234000	490000	16300	25600	231000	10700000	11600000	11600000	12800000	3610000	10500000	2430000	278000	145000	3800000
P5_C_3_6	100	94100	17400000	404000	783000	25800	34400	371000	17400000	17300000	17300000	20300000	6850000	16900000	4630000	438000	248000	6080000
	A_C_1_0
	A_C_1_1
	A_C_1_2
	A_C_1_3
	A_C_1_4
	A_C_1_5
	A_C_1_6
	A_C_2_0
	A_C_2_1
	A_C_2_2
	A_C_2_3
	A_C_2_3
	A_C_2_4
	A_C_2_5
	A_C_2_6
	A_C_3_0
	A_C_3_1
	A_C_3_3
	A_C_3_4
	A_C_3_5
	A_C_3_6
	A_C_4_0
	A_C_4_1
	A_C_4_2
	A_C_4_3
	A_C_4_4
	A_C_4_5
	A_C_4_6
	A_C_5_0
	A_C_5_1
	A_C_5_2
	A_C_5_3
	A_C_5_4
	A_C_5_5
	A_C_5_6
	A_C_6_0
	A_C_6_1
	A_C_6_2
	A_C_6_3
	A_C_6_4
	A_C_6_5
	A_C_6_6

## Sheet: EXP Matrix effects abs and rel
AM2201	Conc (ng/mL)	Area	IS Area		AM2201	Conc (ng/mL)	Area	IS Area		AM2201	Conc (ng/mL)	Area	IS Area		AM2201	Conc (ng/mL)	Area	IS Area		AM2201	Conc (ng/mL)	Area	IS Area		AM2201	Conc (ng/mL)	Area	IS Area
A_C_0_1	0	10570	76900		P1_C_0_1	0	4350	147000		P2_C_0_1	0	10160	136000		P3_C_0_1	0	4570	122000		P4_C_0_1	0	8410	128000		P5_C_0_1	0	9200	135000
A_C_0_2	0	8980	81600		P1_C_0_2	0	10350	147000		P2_C_0_2	0	10630	132000		P3_C_0_2	0	5040	125000		P4_C_0_2	0	9550	130000		P5_C_0_2	0	10940	128000
A_C_0_3	0	10280	86300		P1_C_0_3	0	4940	161000		P2_C_0_3	0	14450	145000		P3_C_0_3	0	7270	133000		P4_C_0_3	0	5500	131000		P5_C_0_3	0	10660	132000
A_C_1_1	1	167000	97300		P1_C_1_1	1	226000	122000		P2_C_1_1	1	190000	101000		P3_C_1_1	1	212000	125000		P4_C_1_1	1	191000	109000		P5_C_1_1	1	187000	114000
A_C_1_2	1	126000	88900		P1_C_1_2	1	236000	121000		P2_C_1_2	1	168000	102000		P3_C_1_2	1	193000	112000		P4_C_1_2	1	207000	103000		P5_C_1_2	1	188000	114900
A_C_1_3	1	135000	85400		P1_C_1_3	1	205000	124000		P2_C_1_3	1	176000	108000		P3_C_1_3	1	210000	122000		P4_C_1_3	1	201000	109000		P5_C_1_3	1	169000	112000
A_C_2_1	5	754000	100000		P1_C_2_1	5	1045000	135000		P2_C_2_1	5	910000	134000		P3_C_2_1	5	955000	111000		P4_C_2_1	5	840000	119000		P5_C_2_1	5	906000	109000
A_C_2_2	5	714000	103200		P1_C_2_2	5	1055000	129000		P2_C_2_2	5	836000	120000		P3_C_2_2	5	972000	104100		P4_C_2_2	5	884000	118000		P5_C_2_2	5	812000	98500
A_C_2_3	5	718000	99700		P1_C_2_3	5	1065000	134000		P2_C_2_3	5	951000	142000		P3_C_2_3	5	948000	112000		P4_C_2_3	5	874000	119000		P5_C_2_3	5	825000	104000
A_C_3_1	10	1520000	104000		P1_C_3_1	10	2460000	135000		P2_C_3_1	10	1820000	110000		P3_C_3_1	10	1880000	114000		P4_C_3_1	10	1880000	109000		P5_C_3_1	10	1830000	117000
A_C_3_2	10	1540000	104000		P1_C_3_2	10	2350000	132000		P2_C_3_2	10	1830000	107000		P3_C_3_2	10	2030000	113000		P4_C_3_2	10	2000000	119000		P5_C_3_2	10	1790000	107200
A_C_3_3	10	1470000	99700		P1_C_3_3	10	2260000	130000		P2_C_3_3	10	1840000	103000		P3_C_3_3A	10	1650000	105000		P4_C_3_3	10	1850000	109000		P5_C_3_3	10	1700000	109000
A_C_4_1	20	3700000	100000		P1_C_4_1	20	5350000	128000		P2_C_4_1	20	4250000	106000		P3_C_4_1	20	4620000	114000		P4_C_4_1	20	4450000	116000		P5_C_4_1	20	3730000	94100
A_C_4_2	20	3570000	92200		P1_C_4_2	20	5190000	131000		P2_C_4_2	20	4310000	104300		P3_C_4_2	20	4560000	109500		P4_C_4_2	20	4450000	117000		P5_C_4_2	20	3760000	94500
A_C_4_3	20	3410000	95500		P1_C_4_3	20	4880000	133000		P2_C_4_3	20	4250000	109000		P3_C_4_3A	20	3630000	93000		P4_C_4_3	20	4240000	116000		P5_C_4_3	20	3910000	95300
A_C_5_1	50	8160000	108200		P1_C_5_1	50	9430000	100000		P2_C_5_1	50	9510000	112000		P3_C_5_1	50	12670000	129000		P4_C_5_1	50	9640000	104000		P5_C_5_1	50	9900000	117000
A_C_5_2	50	8670000	109300		P1_C_5_2	50	9360000	100000		P2_C_5_2	50	9420000	104300		P3_C_5_2	50	12780000	124000		P4_C_5_2	50	10070000	111000		P5_C_5_2	50	10370000	124000
A_C_5_3	50	8370000	108000		P1_C_5_3	50	9380000	101000		P2_C_5_3	50	9320000	120000		P3_C_5_3A	50	10170000	106000		P4_C_5_3	50	9650000	105000		P5_C_5_3	50	10180000	122000
A_C_6_1	100	17500000	113000		P1_C_6_1	100	22200000	134000		P2_C_6_1	100	16100000	83200		P3_C_6_1	100	16900000	120000		P4_C_6_1	100	19800000	122000		P5_C_6_1	100	17000000	94700
A_C_6_2	100	16600000	111000		P1_C_6_2	100	23200000	134000		P2_C_6_2	100	16200000	88800		P3_C_6_2	100	16000000	117800		P4_C_6_2	100	20800000	123000		P5_C_6_2	100	17000000	94100
A_C_6_3	100	17400000	112000		P1_C_6_3	100	22400000	132000		P2_C_6_3	100	16400000	82900		P3_C_6_3A	100	13800000	106000		P4_C_6_3	100	20600000	131000		P5_C_6_3	100	17400000	94100
CBD	Conc (ng/mL)	Area	IS Area		CBD	Conc (ng/mL)	Area	IS Area		CBD	Conc (ng/mL)	Area	IS Area		CBD	Conc (ng/mL)	Area	IS Area		CBD	Conc (ng/mL)	Area	IS Area		CBD	Conc (ng/mL)	Area	IS Area
A_C_0_1	0	601	76900		P1_C_0_1	0	723	147000		P2_C_0_1	0	1070	136000		P3_C_0_1	0	704	122000		P4_C_0_1	0	1040	128000		P5_C_0_1	0	909	135000
A_C_0_2	0	1420	81600		P1_C_0_2	0	758	147000		P2_C_0_2	0	704	132000		P3_C_0_2	0	800	125000		P4_C_0_2	0	396	130000		P5_C_0_2	0	1020	128000
A_C_0_3	0	460	86300		P1_C_0_3	0	713	161000		P2_C_0_3	0	935	145000		P3_C_0_3	0	1110	133000		P4_C_0_3	0	72.5	131000		P5_C_0_3	0	1080	132000
A_C_1_1	1	3510	97300		P1_C_1_1	1	4750	122000		P2_C_1_1	1	5490	101000		P3_C_1_1	1	5540	125000		P4_C_1_1	1	5400	109000		P5_C_1_1	1	5010	114000
A_C_1_2	1	4070	88900		P1_C_1_2	1	5630	121000		P2_C_1_2	1	5940	102000		P3_C_1_2	1	5340	112000		P4_C_1_2	1	4730	103000		P5_C_1_2	1	4230	114900
A_C_1_3	1	3810	85400		P1_C_1_3	1	5010	124000		P2_C_1_3	1	4520	108000		P3_C_1_3	1	4830	122000		P4_C_1_3	1	4360	109000		P5_C_1_3	1	3700	112000
A_C_2_1	5	21000	100000		P1_C_2_1	5	29200	135000		P2_C_2_1	5	22200	134000		P3_C_2_1	5	17800	111000		P4_C_2_1	5	19400	119000		P5_C_2_1	5	15600	109000
A_C_2_2	5	17100	103200		P1_C_2_2	5	26800	129000		P2_C_2_2	5	22300	120000		P3_C_2_2	5	18500	104100		P4_C_2_2	5	18600	118000		P5_C_2_2	5	17500	98500
A_C_2_3	5	16900	99700		P1_C_2_3	5	23800	134000		P2_C_2_3	5	22500	142000		P3_C_2_3	5	16300	112000		P4_C_2_3	5	22800	119000		P5_C_2_3	5	17700	104000
A_C_3_1	10	41700	104000		P1_C_3_1	10	59100	135000		P2_C_3_1	10	40900	110000		P3_C_3_1	10	42100	114000		P4_C_3_1	10	43500	109000		P5_C_3_1	10	38500	117000
A_C_3_2	10	36900	104000		P1_C_3_2	10	54400	132000		P2_C_3_2	10	43200	107000		P3_C_3_2	10	36700	113000		P4_C_3_2	10	42400	119000		P5_C_3_2	10	39800	107200
A_C_3_3	10	32800	99700		P1_C_3_3	10	53700	130000		P2_C_3_3	10	45100	103000		P3_C_3_3A	10	36100	105000		P4_C_3_3	10	38600	109000		P5_C_3_3	10	36800	109000
A_C_4_1	20	93600	100000		P1_C_4_1	20	137000	128000		P2_C_4_1	20	102000	106000		P3_C_4_1	20	91400	114000		P4_C_4_1	20	93200	116000		P5_C_4_1	20	84700	94100
A_C_4_2	20	90600	92200		P1_C_4_2	20	129000	131000		P2_C_4_2	20	97400	104300		P3_C_4_2	20	91300	109500		P4_C_4_2	20	90300	117000		P5_C_4_2	20	84700	94500
A_C_4_3	20	87900	95500		P1_C_4_3	20	121000	133000		P2_C_4_3	20	91600	109000		P3_C_4_3A	20	70800	93000		P4_C_4_3	20	102000	116000		P5_C_4_3	20	81000	95300
A_C_5_1	50	201000	108200		P1_C_5_1	50	248000	100000		P2_C_5_1	50	234000	112000		P3_C_5_1	50	261000	129000		P4_C_5_1	50	217000	104000		P5_C_5_1	50	242000	117000
A_C_5_2	50	193000	109300		P1_C_5_2	50	241000	100000		P2_C_5_2	50	224000	104300		P3_C_5_2	50	240000	124000		P4_C_5_2	50	245000	111000		P5_C_5_2	50	233000	124000
A_C_5_3	50	213000	108000		P1_C_5_3	50	233000	101000		P2_C_5_3	50	214000	120000		P3_C_5_3A	50	231000	106000		P4_C_5_3	50	210000	105000		P5_C_5_3	50	234000	122000
A_C_6_1	100	475000	113000		P1_C_6_1	100	591000	134000		P2_C_6_1	100	355000	83200		P3_C_6_1	100	347000	120000		P4_C_6_1	100	485000	122000		P5_C_6_1	100	342000	94700
A_C_6_2	100	414000	111000		P1_C_6_2	100	562000	134000		P2_C_6_2	100	348000	88800		P3_C_6_2	100	365000	117800		P4_C_6_2	100	485000	123000		P5_C_6_2	100	381000	94100
A_C_6_3	100	402000	112000		P1_C_6_3	100	572000	132000		P2_C_6_3	100	366000	82900		P3_C_6_3A	100	300000	106000		P4_C_6_3	100	486000	131000		P5_C_6_3	100	404000	94100
CBN	Conc (ng/mL)	Area	IS Area		CBN	Conc (ng/mL)	Area	IS Area		CBN	Conc (ng/mL)	Area	IS Area		CBN	Conc (ng/mL)	Area	IS Area		CBN	Conc (ng/mL)	Area	IS Area		CBN	Conc (ng/mL)	Area	IS Area
A_C_0_1	0	3590	76900		P1_C_0_1	0	2530	147000		P2_C_0_1	0	1170	136000		P3_C_0_1	0	2030	122000		P4_C_0_1	0	2290	128000		P5_C_0_1	0	1380	135000
A_C_0_2	0	1220	81600		P1_C_0_2	0	4700	147000		P2_C_0_2	0	3010	132000		P3_C_0_2	0	1530	125000		P4_C_0_2	0	1390	130000		P5_C_0_2	0	1680	128000
A_C_0_3	0	2890	86300		P1_C_0_3	0	3560	161000		P2_C_0_3	0	279	145000		P3_C_0_3	0	2170	133000		P4_C_0_3	0	1950	131000		P5_C_0_3	0	1530	132000
A_C_1_1	1	8190	97300		P1_C_1_1	1	14000	122000		P2_C_1_1	1	11700	101000		P3_C_1_1	1	11500	125000		P4_C_1_1	1	6940	109000		P5_C_1_1	1	9390	114000
A_C_1_2	1	8580	88900		P1_C_1_2	1	13900	121000		P2_C_1_2	1	11000	102000		P3_C_1_2	1	11600	112000		P4_C_1_2	1	8800	103000		P5_C_1_2	1	9110	114900
A_C_1_3	1	8520	85400		P1_C_1_3	1	11000	124000		P2_C_1_3	1	10000	108000		P3_C_1_3	1	10000	122000		P4_C_1_3	1	9410	109000		P5_C_1_3	1	10400	112000
A_C_2_1	5	37500	100000		P1_C_2_1	5	58300	135000		P2_C_2_1	5	52400	134000		P3_C_2_1	5	42800	111000		P4_C_2_1	5	38900	119000		P5_C_2_1	5	31900	109000
A_C_2_2	5	33700	103200		P1_C_2_2	5	51300	129000		P2_C_2_2	5	47100	120000		P3_C_2_2	5	42000	104100		P4_C_2_2	5	43200	118000		P5_C_2_2	5	31500	98500
A_C_2_3	5	32800	99700		P1_C_2_3	5	51700	134000		P2_C_2_3	5	43100	142000		P3_C_2_3	5	34900	112000		P4_C_2_3	5	43600	119000		P5_C_2_3	5	43200	104000
A_C_3_1	10	67900	104000		P1_C_3_1	10	111000	135000		P2_C_3_1	10	90600	110000		P3_C_3_1	10	80700	114000		P4_C_3_1	10	81100	109000		P5_C_3_1	10	74100	117000
A_C_3_2	10	72700	104000		P1_C_3_2	10	112000	132000		P2_C_3_2	10	93200	107000		P3_C_3_2	10	86500	113000		P4_C_3_2	10	79900	119000		P5_C_3_2	10	80000	107200
A_C_3_3	10	70000	99700		P1_C_3_3	10	105000	130000		P2_C_3_3	10	78000	103000		P3_C_3_3A	10	83100	105000		P4_C_3_3	10	90300	109000		P5_C_3_3	10	81400	109000
A_C_4_1	20	160000	100000		P1_C_4_1	20	246000	128000		P2_C_4_1	20	202000	106000		P3_C_4_1	20	183000	114000		P4_C_4_1	20	272000	116000		P5_C_4_1	20	171000	94100
A_C_4_2	20	150000	92200		P1_C_4_2	20	240000	131000		P2_C_4_2	20	195000	104300		P3_C_4_2	20	188000	109500		P4_C_4_2	20	189000	117000		P5_C_4_2	20	157000	94500
A_C_4_3	20	173000	95500		P1_C_4_3	20	215000	133000		P2_C_4_3	20	166000	109000		P3_C_4_3A	20	195000	93000		P4_C_4_3	20	206000	116000		P5_C_4_3	20	162000	95300
A_C_5_1	50	365000	108200		P1_C_5_1	50	448000	100000		P2_C_5_1	50	457000	112000		P3_C_5_1	50	535000	129000		P4_C_5_1	50	465000	104000		P5_C_5_1	50	446000	117000
A_C_5_2	50	357000	109300		P1_C_5_2	50	454000	100000		P2_C_5_2	50	462000	104300		P3_C_5_2	50	565000	124000		P4_C_5_2	50	410000	111000		P5_C_5_2	50	478000	124000
A_C_5_3	50	400000	108000		P1_C_5_3	50	448000	101000		P2_C_5_3	50	361000	120000		P3_C_5_3A	50	707000	106000		P4_C_5_3	50	467000	105000		P5_C_5_3	50	490000	122000
A_C_6_1	100	815000	113000		P1_C_6_1	100	1130000	134000		P2_C_6_1	100	642000	83200		P3_C_6_1	100	773000	120000		P4_C_6_1	100	972000	122000		P5_C_6_1	100	729000	94700
A_C_6_2	100	821000	111000		P1_C_6_2	100	1170000	134000		P2_C_6_2	100	695000	88800		P3_C_6_2	100	747000	117800		P4_C_6_2	100	942000	123000		P5_C_6_2	100	655000	94100
A_C_6_3	100	745000	112000		P1_C_6_3	100	1090000	132000		P2_C_6_3	100	693000	82900		P3_C_6_3A	100	1040000	106000		P4_C_6_3	100	961000	131000		P5_C_6_3	100	783000	94100
HU211	Conc (ng/mL)	Area	IS Area		HU211	Conc (ng/mL)	Area	IS Area		HU211	Conc (ng/mL)	Area	IS Area		HU211	Conc (ng/mL)	Area	IS Area		HU211	Conc (ng/mL)	Area	IS Area		HU211	Conc (ng/mL)	Area	IS Area
A_C_0_1	0	2530	76900		P1_C_0_1	0	2580	147000		P2_C_0_1	0	3830	136000		P3_C_0_1	0	4290	122000		P4_C_0_1	0	1720	128000		P5_C_0_1	0	2260	135000
A_C_0_2	0	3445	81600		P1_C_0_2	0	2030	147000		P2_C_0_2	0	4760	132000		P3_C_0_2	0	3510	125000		P4_C_0_2	0	2420	130000		P5_C_0_2	0	1500	128000
A_C_0_3	0	3560	86300		P1_C_0_3	0	956	161000		P2_C_0_3	0	5540	145000		P3_C_0_3	0	3850	133000		P4_C_0_3	0	3230	131000		P5_C_0_3	0	2370	132000
A_C_1_1	1	6330	97300		P1_C_1_1	1	5620	122000		P2_C_1_1	1	10500	101000		P3_C_1_1	1	6500	125000		P4_C_1_1	1	5150	109000		P5_C_1_1	1	6790	114000
A_C_1_2	1	5935	88900		P1_C_1_2	1	6590	121000		P2_C_1_2	1	10900	102000		P3_C_1_2	1	7380	112000		P4_C_1_2	1	5800	103000		P5_C_1_2	1	6870	114900
A_C_1_3	1	7630	85400		P1_C_1_3	1	7040	124000		P2_C_1_3	1	9780	108000		P3_C_1_3	1	5810	122000		P4_C_1_3	1	4620	109000		P5_C_1_3	1	5460	112000
A_C_2_1	5	15500	100000		P1_C_2_1	5	24400	135000		P2_C_2_1	5	22500	134000		P3_C_2_1	5	25600	111000		P4_C_2_1	5	19000	119000		P5_C_2_1	5	20000	109000
A_C_2_2	5	16000	103200		P1_C_2_2	5	27200	129000		P2_C_2_2	5	22000	120000		P3_C_2_2	5	20900	104100		P4_C_2_2	5	18500	118000		P5_C_2_2	5	18900	98500
A_C_2_3	5	15100	99700		P1_C_2_3	5	28200	134000		P2_C_2_3	5	22200	142000		P3_C_2_3	5	25600	112000		P4_C_2_3	5	20000	119000		P5_C_2_3	5	16900	104000
A_C_3_1	10	34900	104000		P1_C_3_1	10	48900	135000		P2_C_3_1	10	44800	110000		P3_C_3_1	10	41300	114000		P4_C_3_1	10	41500	109000		P5_C_3_1	10	37200	117000
A_C_3_2	10	29000	104000		P1_C_3_2	10	48500	132000		P2_C_3_2	10	39500	107000		P3_C_3_2	10	36900	113000		P4_C_3_2	10	40800	119000		P5_C_3_2	10	38500	107200
A_C_3_3	10	34000	99700		P1_C_3_3	10	56000	130000		P2_C_3_3	10	42900	103000		P3_C_3_3A	10	45700	105000		P4_C_3_3	10	43300	109000		P5_C_3_3	10	39100	109000
A_C_4_1	20	72800	100000		P1_C_4_1	20	98100	128000		P2_C_4_1	20	87200	106000		P3_C_4_1	20	93200	114000		P4_C_4_1	20	95000	116000		P5_C_4_1	20	78500	94100
A_C_4_2	20	65800	92200		P1_C_4_2	20	105000	131000		P2_C_4_2	20	82200	104300		P3_C_4_2	20	101400	109500		P4_C_4_2	20	110000	117000		P5_C_4_2	20	81000	94500
A_C_4_3	20	71500	95500		P1_C_4_3	20	104000	133000		P2_C_4_3	20	98600	109000		P3_C_4_3A	20	109000	93000		P4_C_4_3	20	98000	116000		P5_C_4_3	20	78500	95300
A_C_5_1	50	150000	108200		P1_C_5_1	50	192000	100000		P2_C_5_1	50	216000	112000		P3_C_5_1	50	241000	129000		P4_C_5_1	50	236000	104000		P5_C_5_1	50	222000	117000
A_C_5_2	50	153000	109300		P1_C_5_2	50	202000	100000		P2_C_5_2	50	189000	104300		P3_C_5_2	50	221000	124000		P4_C_5_2	50	201000	111000		P5_C_5_2	50	224000	124000
A_C_5_3	50	157000	108000		P1_C_5_3	50	224000	101000		P2_C_5_3	50	217000	120000		P3_C_5_3A	50	201000	106000		P4_C_5_3	50	211000	105000		P5_C_5_3	50	231000	122000
A_C_6_1	100	326000	113000		P1_C_6_1	100	494000	134000		P2_C_6_1	100	370000	83200		P3_C_6_1	100	357000	120000		P4_C_6_1	100	390000	122000		P5_C_6_1	100	338000	94700
A_C_6_2	100	328000	111000		P1_C_6_2	100	448000	134000		P2_C_6_2	100	323000	88800		P3_C_6_2	100	318000	117800		P4_C_6_2	100	443000	123000		P5_C_6_2	100	338000	94100
A_C_6_3	100	355000	112000		P1_C_6_3	100	543000	132000		P2_C_6_3	100	363000	82900		P3_C_6_3A	100	352000	106000		P4_C_6_3	100	473000	131000		P5_C_6_3	100	371000	94100
JWH019	Conc (ng/mL)	Area	IS Area		JWH019	Conc (ng/mL)	Area	IS Area		JWH019	Conc (ng/mL)	Area	IS Area		JWH019	Conc (ng/mL)	Area	IS Area		JWH019	Conc (ng/mL)	Area	IS Area		JWH019	Conc (ng/mL)	Area	IS Area
A_C_0_1	0	11900	76900		P1_C_0_1	0	5150	147000		P2_C_0_1	0	10300	136000		P3_C_0_1	0	10800	122000		P4_C_0_1	0	12400	128000		P5_C_0_1	0	11500	135000
A_C_0_2	0	17450	81600		P1_C_0_2	0	9420	147000		P2_C_0_2	0	12100	132000		P3_C_0_2	0	9680	125000		P4_C_0_2	0	11300	130000		P5_C_0_2	0	3380	128000
A_C_0_3	0	10800	86300		P1_C_0_3	0	12400	161000		P2_C_0_3	0	11400	145000		P3_C_0_3	0	11200	133000		P4_C_0_3	0	11700	131000		P5_C_0_3	0	10200	132000
A_C_1_1	1	213000	97300		P1_C_1_1	1	305000	122000		P2_C_1_1	1	261000	101000		P3_C_1_1	1	271000	125000		P4_C_1_1	1	216000	109000		P5_C_1_1	1	197000	114000
A_C_1_2	1	207000	88900		P1_C_1_2	1	283000	121000		P2_C_1_2	1	247000	102000		P3_C_1_2	1	280000	112000		P4_C_1_2	1	223000	103000		P5_C_1_2	1	220000	114900
A_C_1_3	1	186000	85400		P1_C_1_3	1	287000	124000		P2_C_1_3	1	245000	108000		P3_C_1_3	1	291000	122000		P4_C_1_3	1	229000	109000		P5_C_1_3	1	207000	112000
A_C_2_1	5	951000	100000		P1_C_2_1	5	1520000	135000		P2_C_2_1	5	1050000	134000		P3_C_2_1	5	1130000	111000		P4_C_2_1	5	1010000	119000		P5_C_2_1	5	958000	109000
A_C_2_2	5	875000	103200		P1_C_2_2	5	1410000	129000		P2_C_2_2	5	1020000	120000		P3_C_2_2	5	1130000	104100		P4_C_2_2	5	1010000	118000		P5_C_2_2	5	947000	98500
A_C_2_3	5	905000	99700		P1_C_2_3	5	1300000	134000		P2_C_2_3	5	1000000	142000		P3_C_2_3	5	1090000	112000		P4_C_2_3	5	1020000	119000		P5_C_2_3	5	920000	104000
A_C_3_1	10	2110000	104000		P1_C_3_1	10	3130000	135000		P2_C_3_1	10	2360000	110000		P3_C_3_1	10	2330000	114000		P4_C_3_1	10	2200000	109000		P5_C_3_1	10	2040000	117000
A_C_3_2	10	1990000	104000		P1_C_3_2	10	3020000	132000		P2_C_3_2	10	2370000	107000		P3_C_3_2	10	2210000	113000		P4_C_3_2	10	2190000	119000		P5_C_3_2	10	2140000	107200
A_C_3_3	10	1960000	99700		P1_C_3_3	10	2900000	130000		P2_C_3_3	10	2300000	103000		P3_C_3_3A	10	2340000	105000		P4_C_3_3	10	2310000	109000		P5_C_3_3	10	2040000	109000
A_C_4_1	20	4680000	100000		P1_C_4_1	20	6740000	128000		P2_C_4_1	20	5540000	106000		P3_C_4_1	20	5000000	114000		P4_C_4_1	20	4160000	116000		P5_C_4_1	20	4010000	94100
A_C_4_2	20	4500000	92200		P1_C_4_2	20	6610000	131000		P2_C_4_2	20	5260000	104300		P3_C_4_2	20	4940000	109500		P4_C_4_2	20	5100000	117000		P5_C_4_2	20	4190000	94500
A_C_4_3	20	4620000	95500		P1_C_4_3	20	6090000	133000		P2_C_4_3	20	5080000	109000		P3_C_4_3A	20	5270000	93000		P4_C_4_3	20	5150000	116000		P5_C_4_3	20	4070000	95300
A_C_5_1	50	10800000	108200		P1_C_5_1	50	12400000	100000		P2_C_5_1	50	11300000	112000		P3_C_5_1	50	11000000	129000		P4_C_5_1	50	10300000	104000		P5_C_5_1	50	10900000	117000
A_C_5_2	50	10600000	109300		P1_C_5_2	50	11900000	100000		P2_C_5_2	50	11300000	104300		P3_C_5_2	50	10400000	124000		P4_C_5_2	50	10900000	111000		P5_C_5_2	50	10700000	124000
A_C_5_3	50	10100000	108000		P1_C_5_3	50	11500000	101000		P2_C_5_3	50	10700000	120000		P3_C_5_3A	50	9300000	106000		P4_C_5_3	50	10700000	105000		P5_C_5_3	50	10700000	122000
A_C_6_1	100	19800000	113000		P1_C_6_1	100	25000000	134000		P2_C_6_1	100	16800000	83200		P3_C_6_1	100	17600000	120000		P4_C_6_1	100	21400000	122000		P5_C_6_1	100	16400000	94700
A_C_6_2	100	19600000	111000		P1_C_6_2	100	23800000	134000		P2_C_6_2	100	17100000	88800		P3_C_6_2	100	16900000	117800		P4_C_6_2	100	21700000	123000		P5_C_6_2	100	17000000	94100
A_C_6_3	100	19700000	112000		P1_C_6_3	100	24400000	132000		P2_C_6_3	100	16900000	82900		P3_C_6_3A	100	20000000	106000		P4_C_6_3	100	21600000	131000		P5_C_6_3	100	17400000	94100
JWH081	Conc (ng/mL)	Area	IS Area		JWH081	Conc (ng/mL)	Area	IS Area		JWH081	Conc (ng/mL)	Area	IS Area		JWH081	Conc (ng/mL)	Area	IS Area		JWH081	Conc (ng/mL)	Area	IS Area		JWH081	Conc (ng/mL)	Area	IS Area
A_C_0_1	0	11500	76900		P1_C_0_1	0	6980	147000		P2_C_0_1	0	6030	136000		P3_C_0_1	0	8600	122000		P4_C_0_1	0	11800	128000		P5_C_0_1	0	8060	135000
A_C_0_2	0	13500	81600		P1_C_0_2	0	10400	147000		P2_C_0_2	0	9540	132000		P3_C_0_2	0	8610	125000		P4_C_0_2	0	9060	130000		P5_C_0_2	0	8190	128000
A_C_0_3	0	9110	86300		P1_C_0_3	0	9800	161000		P2_C_0_3	0	7820	145000		P3_C_0_3	0	7590	133000		P4_C_0_3	0	9810	131000		P5_C_0_3	0	9050	132000
A_C_1_1	1	199000	97300		P1_C_1_1	1	309000	122000		P2_C_1_1	1	222000	101000		P3_C_1_1	1	221000	125000		P4_C_1_1	1	205000	109000		P5_C_1_1	1	212000	114000
A_C_1_2	1	187000	88900		P1_C_1_2	1	295000	121000		P2_C_1_2	1	209000	102000		P3_C_1_2	1	221000	112000		P4_C_1_2	1	227000	103000		P5_C_1_2	1	207000	114900
A_C_1_3	1	152000	85400		P1_C_1_3	1	269000	124000		P2_C_1_3	1	210000	108000		P3_C_1_3	1	231000	122000		P4_C_1_3	1	216000	109000		P5_C_1_3	1	205000	112000
A_C_2_1	5	991000	100000		P1_C_2_1	5	1470000	135000		P2_C_2_1	5	1130000	134000		P3_C_2_1	5	909000	111000		P4_C_2_1	5	996000	119000		P5_C_2_1	5	900000	109000
A_C_2_2	5	863000	103200		P1_C_2_2	5	1380000	129000		P2_C_2_2	5	1030000	120000		P3_C_2_2	5	909000	104100		P4_C_2_2	5	1080000	118000		P5_C_2_2	5	960000	98500
A_C_2_3	5	763000	99700		P1_C_2_3	5	1330000	134000		P2_C_2_3	5	1100000	142000		P3_C_2_3	5	915000	112000		P4_C_2_3	5	1090000	119000		P5_C_2_3	5	931000	104000
A_C_3_1	10	2050000	104000		P1_C_3_1	10	3080000	135000		P2_C_3_1	10	2200000	110000		P3_C_3_1	10	1850000	114000		P4_C_3_1	10	2060000	109000		P5_C_3_1	10	2020000	117000
A_C_3_2	10	1860000	104000		P1_C_3_2	10	2960000	132000		P2_C_3_2	10	1990000	107000		P3_C_3_2	10	1910000	113000		P4_C_3_2	10	2300000	119000		P5_C_3_2	10	2100000	107200
A_C_3_3	10	1690000	99700		P1_C_3_3	10	2730000	130000		P2_C_3_3	10	2060000	103000		P3_C_3_3A	10	2050000	105000		P4_C_3_3	10	2170000	109000		P5_C_3_3	10	2020000	109000
A_C_4_1	20	5060000	100000		P1_C_4_1	20	7060000	128000		P2_C_4_1	20	4850000	106000		P3_C_4_1	20	4520000	114000		P4_C_4_1	20	4820000	116000		P5_C_4_1	20	4120000	94100
A_C_4_2	20	4490000	92200		P1_C_4_2	20	6770000	131000		P2_C_4_2	20	4530000	104300		P3_C_4_2	20	4280000	109500		P4_C_4_2	20	5020000	117000		P5_C_4_2	20	4270000	94500
A_C_4_3	20	4050000	95500		P1_C_4_3	20	6270000	133000		P2_C_4_3	20	4610000	109000		P3_C_4_3A	20	4530000	93000		P4_C_4_3	20	4950000	116000		P5_C_4_3	20	4260000	95300
A_C_5_1	50	12000000	108200		P1_C_5_1	50	13800000	100000		P2_C_5_1	50	10600000	112000		P3_C_5_1	50	9800000	129000		P4_C_5_1	50	9960000	104000		P5_C_5_1	50	11300000	117000
A_C_5_2	50	10500000	109300		P1_C_5_2	50	11900000	100000		P2_C_5_2	50	9990000	104300		P3_C_5_2	50	9700000	124000		P4_C_5_2	50	11600000	111000		P5_C_5_2	50	11400000	124000
A_C_5_3	50	9390000	108000		P1_C_5_3	50	12100000	101000		P2_C_5_3	50	10200000	120000		P3_C_5_3A	50	9100000	106000		P4_C_5_3	50	11400000	105000		P5_C_5_3	50	11600000	122000
A_C_6_1	100	21400000	113000		P1_C_6_1	100	26900000	134000		P2_C_6_1	100	16100000	83200		P3_C_6_1	100	18300000	120000		P4_C_6_1	100	21200000	122000		P5_C_6_1	100	17600000	94700
A_C_6_2	100	18900000	111000		P1_C_6_2	100	25900000	134000		P2_C_6_2	100	16300000	88800		P3_C_6_2	100	17200000	117800		P4_C_6_2	100	22200000	123000		P5_C_6_2	100	18200000	94100
A_C_6_3	100	18600000	112000		P1_C_6_3	100	24100000	132000		P2_C_6_3	100	16300000	82900		P3_C_6_3A	100	17100000	106000		P4_C_6_3	100	22100000	131000		P5_C_6_3	100	17300000	94100
JWH122	Conc (ng/mL)	Area	IS Area		JWH122	Conc (ng/mL)	Area	IS Area		JWH122	Conc (ng/mL)	Area	IS Area		JWH122	Conc (ng/mL)	Area	IS Area		JWH122	Conc (ng/mL)	Area	IS Area		JWH122	Conc (ng/mL)	Area	IS Area
A_C_0_1	0	12900	76900		P1_C_0_1	0	8160	147000		P2_C_0_1	0	8230	136000		P3_C_0_1	0	9920	122000		P4_C_0_1	0	10800	128000		P5_C_0_1	0	12000	135000
A_C_0_2	0	13400	81600		P1_C_0_2	0	12000	147000		P2_C_0_2	0	12900	132000		P3_C_0_2	0	11800	125000		P4_C_0_2	0	11000	130000		P5_C_0_2	0	9260	128000
A_C_0_3	0	12300	86300		P1_C_0_3	0	11100	161000		P2_C_0_3	0	13100	145000		P3_C_0_3	0	10900	133000		P4_C_0_3	0	8860	131000		P5_C_0_3	0	9440	132000
A_C_1_1	1	219000	97300		P1_C_1_1	1	333000	122000		P2_C_1_1	1	277000	101000		P3_C_1_1	1	308000	125000		P4_C_1_1	1	240000	109000		P5_C_1_1	1	241000	114000
A_C_1_2	1	220000	88900		P1_C_1_2	1	300000	121000		P2_C_1_2	1	267000	102000		P3_C_1_2	1	285000	112000		P4_C_1_2	1	241000	103000		P5_C_1_2	1	238000	114900
A_C_1_3	1	196000	85400		P1_C_1_3	1	276000	124000		P2_C_1_3	1	258000	108000		P3_C_1_3	1	296000	122000		P4_C_1_3	1	254000	109000		P5_C_1_3	1	238000	112000
A_C_2_1	5	1030000	100000		P1_C_2_1	5	1530000	135000		P2_C_2_1	5	1410000	134000		P3_C_2_1	5	1130000	111000		P4_C_2_1	5	1150000	119000		P5_C_2_1	5	1060000	109000
A_C_2_2	5	965000	103200		P1_C_2_2	5	1490000	129000		P2_C_2_2	5	1350000	120000		P3_C_2_2	5	1140000	104100		P4_C_2_2	5	1200000	118000		P5_C_2_2	5	1040000	98500
A_C_2_3	5	942000	99700		P1_C_2_3	5	1420000	134000		P2_C_2_3	5	1380000	142000		P3_C_2_3	5	1140000	112000		P4_C_2_3	5	1190000	119000		P5_C_2_3	5	1090000	104000
A_C_3_1	10	2280000	104000		P1_C_3_1	10	3330000	135000		P2_C_3_1	10	2700000	110000		P3_C_3_1	10	2510000	114000		P4_C_3_1	10	2450000	109000		P5_C_3_1	10	2330000	117000
A_C_3_2	10	2160000	104000		P1_C_3_2	10	3290000	132000		P2_C_3_2	10	2620000	107000		P3_C_3_2	10	2490000	113000		P4_C_3_2	10	2530000	119000		P5_C_3_2	10	2330000	107200
A_C_3_3	10	2040000	99700		P1_C_3_3	10	3170000	130000		P2_C_3_3	10	2570000	103000		P3_C_3_3A	10	2710000	105000		P4_C_3_3	10	2610000	109000		P5_C_3_3	10	2300000	109000
A_C_4_1	20	5170000	100000		P1_C_4_1	20	7130000	128000		P2_C_4_1	20	5930000	106000		P3_C_4_1	20	5840000	114000		P4_C_4_1	20	4670000	116000		P5_C_4_1	20	4640000	94100
A_C_4_2	20	4960000	92200		P1_C_4_2	20	6910000	131000		P2_C_4_2	20	5780000	104300		P3_C_4_2	20	5860000	109500		P4_C_4_2	20	5560000	117000		P5_C_4_2	20	4780000	94500
A_C_4_3	20	5020000	95500		P1_C_4_3	20	6470000	133000		P2_C_4_3	20	5730000	109000		P3_C_4_3A	20	5700000	93000		P4_C_4_3	20	5670000	116000		P5_C_4_3	20	4890000	95300
A_C_5_1	50	11800000	108200		P1_C_5_1	50	12400000	100000		P2_C_5_1	50	12900000	112000		P3_C_5_1	50	12500000	129000		P4_C_5_1	50	11000000	104000		P5_C_5_1	50	13000000	117000
A_C_5_2	50	11400000	109300		P1_C_5_2	50	12000000	100000		P2_C_5_2	50	12500000	104300		P3_C_5_2	50	12300000	124000		P4_C_5_2	50	11600000	111000		P5_C_5_2	50	13400000	124000
A_C_5_3	50	11800000	108000		P1_C_5_3	50	12000000	101000		P2_C_5_3	50	12500000	120000		P3_C_5_3A	50	11900000	106000		P4_C_5_3	50	11600000	105000		P5_C_5_3	50	12800000	122000
A_C_6_1	100	22800000	113000		P1_C_6_1	100	27500000	134000		P2_C_6_1	100	18500000	83200		P3_C_6_1	100	19600000	120000		P4_C_6_1	100	24300000	122000		P5_C_6_1	100	19200000	94700
A_C_6_2	100	21100000	111000		P1_C_6_2	100	26900000	134000		P2_C_6_2	100	18600000	88800		P3_C_6_2	100	20700000	117800		P4_C_6_2	100	24100000	123000		P5_C_6_2	100	20200000	94100
A_C_6_3	100	21600000	112000		P1_C_6_3	100	26900000	132000		P2_C_6_3	100	17700000	82900		P3_C_6_3A	100	21400000	106000		P4_C_6_3	100	24300000	131000		P5_C_6_3	100	20300000	94100
JWH200	Conc (ng/mL)	Area	IS Area		JWH200	Conc (ng/mL)	Area	IS Area		JWH200	Conc (ng/mL)	Area	IS Area		JWH200	Conc (ng/mL)	Area	IS Area		JWH200	Conc (ng/mL)	Area	IS Area		JWH200	Conc (ng/mL)	Area	IS Area
A_C_0_1	0	5550	76900		P1_C_0_1	0	3620	147000		P2_C_0_1	0	3950	136000		P3_C_0_1	0	5030	122000		P4_C_0_1	0	626	128000		P5_C_0_1	0	1400	135000
A_C_0_2	0	5460	81600		P1_C_0_2	0	3650	147000		P2_C_0_2	0	3510	132000		P3_C_0_2	0	1900	125000		P4_C_0_2	0	2130	130000		P5_C_0_2	0	1590	128000
A_C_0_3	0	4730	86300		P1_C_0_3	0	5270	161000		P2_C_0_3	0	3120	145000		P3_C_0_3	0	4010	133000		P4_C_0_3	0	2540	131000		P5_C_0_3	0	2240	132000
A_C_1_1	1	63100	97300		P1_C_1_1	1	90800	122000		P2_C_1_1	1	76100	101000		P3_C_1_1	1	85400	125000		P4_C_1_1	1	61800	109000		P5_C_1_1	1	71200	114000
A_C_1_2	1	62300	88900		P1_C_1_2	1	92000	121000		P2_C_1_2	1	78200	102000		P3_C_1_2	1	80700	112000		P4_C_1_2	1	73200	103000		P5_C_1_2	1	70800	114900
A_C_1_3	1	62200	85400		P1_C_1_3	1	88400	124000		P2_C_1_3	1	77600	108000		P3_C_1_3	1	80500	122000		P4_C_1_3	1	71200	109000		P5_C_1_3	1	72200	112000
A_C_2_1	5	310000	100000		P1_C_2_1	5	460000	135000		P2_C_2_1	5	385000	134000		P3_C_2_1	5	378000	111000		P4_C_2_1	5	316000	119000		P5_C_2_1	5	341000	109000
A_C_2_2	5	288000	103200		P1_C_2_2	5	408000	129000		P2_C_2_2	5	382000	120000		P3_C_2_2	5	371000	104100		P4_C_2_2	5	329000	118000		P5_C_2_2	5	327000	98500
A_C_2_3	5	292000	99700		P1_C_2_3	5	475000	134000		P2_C_2_3	5	379000	142000		P3_C_2_3	5	365000	112000		P4_C_2_3	5	332000	119000		P5_C_2_3	5	337000	104000
A_C_3_1	10	628000	104000		P1_C_3_1	10	924000	135000		P2_C_3_1	10	774000	110000		P3_C_3_1	10	796000	114000		P4_C_3_1	10	668000	109000		P5_C_3_1	10	628000	117000
A_C_3_2	10	603000	104000		P1_C_3_2	10	888000	132000		P2_C_3_2	10	775000	107000		P3_C_3_2	10	778000	113000		P4_C_3_2	10	685000	119000		P5_C_3_2	10	683000	107200
A_C_3_3	10	569000	99700		P1_C_3_3	10	885000	130000		P2_C_3_3	10	815000	103000		P3_C_3_3A	10	633000	105000		P4_C_3_3	10	672000	109000		P5_C_3_3	10	678000	109000
A_C_4_1	20	1500000	100000		P1_C_4_1	20	2110000	128000		P2_C_4_1	20	1820000	106000		P3_C_4_1	20	1770000	114000		P4_C_4_1	20	1530000	116000		P5_C_4_1	20	1480000	94100
A_C_4_2	20	1440000	92200		P1_C_4_2	20	2040000	131000		P2_C_4_2	20	1910000	104300		P3_C_4_2	20	1740000	109500		P4_C_4_2	20	1570000	117000		P5_C_4_2	20	1400000	94500
A_C_4_3	20	1460000	95500		P1_C_4_3	20	2010000	133000		P2_C_4_3	20	1850000	109000		P3_C_4_3A	20	1490000	93000		P4_C_4_3	20	1500000	116000		P5_C_4_3	20	1450000	95300
A_C_5_1	50	3430000	108200		P1_C_5_1	50	3990000	100000		P2_C_5_1	50	4260000	112000		P3_C_5_1	50	4380000	129000		P4_C_5_1	50	3470000	104000		P5_C_5_1	50	3500000	117000
A_C_5_2	50	3290000	109300		P1_C_5_2	50	3920000	100000		P2_C_5_2	50	4100000	104300		P3_C_5_2	50	4330000	124000		P4_C_5_2	50	3450000	111000		P5_C_5_2	50	3720000	124000
A_C_5_3	50	3250000	108000		P1_C_5_3	50	3910000	101000		P2_C_5_3	50	4230000	120000		P3_C_5_3A	50	4230000	106000		P4_C_5_3	50	3410000	105000		P5_C_5_3	50	3610000	122000
A_C_6_1	100	6480000	113000		P1_C_6_1	100	8770000	134000		P2_C_6_1	100	7770000	83200		P3_C_6_1	100	6580000	120000		P4_C_6_1	100	6720000	122000		P5_C_6_1	100	6520000	94700
A_C_6_2	100	6280000	111000		P1_C_6_2	100	8900000	134000		P2_C_6_2	100	7850000	88800		P3_C_6_2	100	6410000	117800		P4_C_6_2	100	7070000	123000		P5_C_6_2	100	6470000	94100
A_C_6_3	100	6580000	112000		P1_C_6_3	100	8870000	132000		P2_C_6_3	100	7910000	82900		P3_C_6_3A	100	4880000	106000		P4_C_6_3	100	7090000	131000		P5_C_6_3	100	6850000	94100
MEPH	Conc (ng/mL)	Area	IS Area		MEPH	Conc (ng/mL)	Area	IS Area		MEPH	Conc (ng/mL)	Area	IS Area		MEPH	Conc (ng/mL)	Area	IS Area		MEPH	Conc (ng/mL)	Area	IS Area		MEPH	Conc (ng/mL)	Area	IS Area
A_C_0_1	0	2900	76900		P1_C_0_1	0	2020	147000		P2_C_0_1	0	2900	136000		P3_C_0_1	0	2120	122000		P4_C_0_1	0	2900	128000		P5_C_0_1	0	3860	135000
A_C_0_2	0	10850	81600		P1_C_0_2	0	2180	147000		P2_C_0_2	0	3810	132000		P3_C_0_2	0	1900	125000		P4_C_0_2	0	4490	130000		P5_C_0_2	0	2590	128000
A_C_0_3	0	1610	86300		P1_C_0_3	0	3500	161000		P2_C_0_3	0	5060	145000		P3_C_0_3	0	3080	133000		P4_C_0_3	0	4230	131000		P5_C_0_3	0	2690	132000
A_C_1_1	1	92900	97300		P1_C_1_1	1	88100	122000		P2_C_1_1	1	54600	101000		P3_C_1_1	1	64800	125000		P4_C_1_1	1	56600	109000		P5_C_1_1	1	50000	114000
A_C_1_2	1	90600	88900		P1_C_1_2	1	69100	121000		P2_C_1_2	1	53700	102000		P3_C_1_2	1	68600	112000		P4_C_1_2	1	57300	103000		P5_C_1_2	1	48200	114900
A_C_1_3	1	82700	85400		P1_C_1_3	1	77700	124000		P2_C_1_3	1	53200	108000		P3_C_1_3	1	68600	122000		P4_C_1_3	1	54500	109000		P5_C_1_3	1	47400	112000
A_C_2_1	5	445000	100000		P1_C_2_1	5	397000	135000		P2_C_2_1	5	255000	134000		P3_C_2_1	5	301000	111000		P4_C_2_1	5	255000	119000		P5_C_2_1	5	225000	109000
A_C_2_2	5	411000	103200		P1_C_2_2	5	353000	129000		P2_C_2_2	5	252000	120000		P3_C_2_2	5	296000	104100		P4_C_2_2	5	231000	118000		P5_C_2_2	5	226000	98500
A_C_2_3	5	414000	99700		P1_C_2_3	5	335000	134000		P2_C_2_3	5	255000	142000		P3_C_2_3	5	280000	112000		P4_C_2_3	5	242000	119000		P5_C_2_3	5	215000	104000
A_C_3_1	10	954000	104000		P1_C_3_1	10	847000	135000		P2_C_3_1	10	561000	110000		P3_C_3_1	10	593000	114000		P4_C_3_1	10	538000	109000		P5_C_3_1	10	438000	117000
A_C_3_2	10	882000	104000		P1_C_3_2	10	737000	132000		P2_C_3_2	10	553000	107000		P3_C_3_2	10	611000	113000		P4_C_3_2	10	509000	119000		P5_C_3_2	10	438000	107200
A_C_3_3	10	885000	99700		P1_C_3_3	10	722000	130000		P2_C_3_3	10	553000	103000		P3_C_3_3A	10	562000	105000		P4_C_3_3	10	518000	109000		P5_C_3_3	10	409000	109000
A_C_4_1	20	2080000	100000		P1_C_4_1	20	1930000	128000		P2_C_4_1	20	1330000	106000		P3_C_4_1	20	1440000	114000		P4_C_4_1	20	1160000	116000		P5_C_4_1	20	978000	94100
A_C_4_2	20	2020000	92200		P1_C_4_2	20	1700000	131000		P2_C_4_2	20	1300000	104300		P3_C_4_2	20	1410000	109500		P4_C_4_2	20	1100000	117000		P5_C_4_2	20	966000	94500
A_C_4_3	20	1960000	95500		P1_C_4_3	20	1600000	133000		P2_C_4_3	20	1240000	109000		P3_C_4_3A	20	1260000	93000		P4_C_4_3	20	1140000	116000		P5_C_4_3	20	951000	95300
A_C_5_1	50	4980000	108200		P1_C_5_1	50	3650000	100000		P2_C_5_1	50	2990000	112000		P3_C_5_1	50	3310000	129000		P4_C_5_1	50	2540000	104000		P5_C_5_1	50	2490000	117000
A_C_5_2	50	4730000	109300		P1_C_5_2	50	3330000	100000		P2_C_5_2	50	2910000	104300		P3_C_5_2	50	3230000	124000		P4_C_5_2	50	2530000	111000		P5_C_5_2	50	2440000	124000
A_C_5_3	50	4580000	108000		P1_C_5_3	50	3170000	101000		P2_C_5_3	50	2830000	120000		P3_C_5_3A	50	3090000	106000		P4_C_5_3	50	2520000	105000		P5_C_5_3	50	2430000	122000
A_C_6_1	100	9620000	113000		P1_C_6_1	100	8310000	134000		P2_C_6_1	100	5670000	83200		P3_C_6_1	100	4890000	120000		P4_C_6_1	100	5280000	122000		P5_C_6_1	100	4650000	94700
A_C_6_2	100	9190000	111000		P1_C_6_2	100	7450000	134000		P2_C_6_2	100	5900000	88800		P3_C_6_2	100	5030000	117800		P4_C_6_2	100	5150000	123000		P5_C_6_2	100	4710000	94100
A_C_6_3	100	9010000	112000		P1_C_6_3	100	7040000	132000		P2_C_6_3	100	5890000	82900		P3_C_6_3A	100	4740000	106000		P4_C_6_3	100	5230000	131000		P5_C_6_3	100	4630000	94100
THC	Conc (ng/mL)	Area	IS Area		THC	Conc (ng/mL)	Area	IS Area		THC	Conc (ng/mL)	Area	IS Area		THC	Conc (ng/mL)	Area	IS Area		THC	Conc (ng/mL)	Area	IS Area		THC	Conc (ng/mL)	Area	IS Area
A_C_0_1	0	566	76900		P1_C_0_1	0	315	147000		P2_C_0_1	0	729	136000		P3_C_0_1	0	574	122000		P4_C_0_1	0	1150	128000		P5_C_0_1	0	584	135000
A_C_0_2	0	1002	81600		P1_C_0_2	0	852	147000		P2_C_0_2	0	903	132000		P3_C_0_2	0	465	125000		P4_C_0_2	0	667	130000		P5_C_0_2	0	429	128000
A_C_0_3	0	855	86300		P1_C_0_3	0	1020	161000		P2_C_0_3	0	609	145000		P3_C_0_3	0	495	133000		P4_C_0_3	0	541	131000		P5_C_0_3	0	491	132000
A_C_1_1	1	3800	97300		P1_C_1_1	1	5670	122000		P2_C_1_1	1	4810	101000		P3_C_1_1	1	5180	125000		P4_C_1_1	1	5230	109000		P5_C_1_1	1	4400	114000
A_C_1_2	1	3580	88900		P1_C_1_2	1	6050	121000		P2_C_1_2	1	4850	102000		P3_C_1_2	1	4890	112000		P4_C_1_2	1	4390	103000		P5_C_1_2	1	4760	114900
A_C_1_3	1	4390	85400		P1_C_1_3	1	6810	124000		P2_C_1_3	1	5250	108000		P3_C_1_3	1	5340	122000		P4_C_1_3	1	5270	109000		P5_C_1_3	1	4350	112000
A_C_2_1	5	19300	100000		P1_C_2_1	5	27100	135000		P2_C_2_1	5	24400	134000		P3_C_2_1	5	23000	111000		P4_C_2_1	5	24300	119000		P5_C_2_1	5	19700	109000
A_C_2_2	5	19000	103200		P1_C_2_2	5	25000	129000		P2_C_2_2	5	24100	120000		P3_C_2_2	5	18400	104100		P4_C_2_2	5	24100	118000		P5_C_2_2	5	17500	98500
A_C_2_3	5	19900	99700		P1_C_2_3	5	30900	134000		P2_C_2_3	5	26200	142000		P3_C_2_3	5	22000	112000		P4_C_2_3	5	24500	119000		P5_C_2_3	5	22600	104000
A_C_3_1	10	36700	104000		P1_C_3_1	10	59200	135000		P2_C_3_1	10	44800	110000		P3_C_3_1	10	50400	114000		P4_C_3_1	10	42700	109000		P5_C_3_1	10	45100	117000
A_C_3_2	10	37700	104000		P1_C_3_2	10	53200	132000		P2_C_3_2	10	42200	107000		P3_C_3_2	10	39700	113000		P4_C_3_2	10	48300	119000		P5_C_3_2	10	44000	107200
A_C_3_3	10	35400	99700		P1_C_3_3	10	58900	130000		P2_C_3_3	10	46800	103000		P3_C_3_3A	10	39900	105000		P4_C_3_3	10	50900	109000		P5_C_3_3	10	45700	109000
A_C_4_1	20	94900	100000		P1_C_4_1	20	119000	128000		P2_C_4_1	20	98200	106000		P3_C_4_1	20	110000	114000		P4_C_4_1	20	105000	116000		P5_C_4_1	20	85600	94100
A_C_4_2	20	97700	92200		P1_C_4_2	20	114000	131000		P2_C_4_2	20	95100	104300		P3_C_4_2	20	90800	109500		P4_C_4_2	20	103000	117000		P5_C_4_2	20	89100	94500
A_C_4_3	20	91400	95500		P1_C_4_3	20	133000	133000		P2_C_4_3	20	109000	109000		P3_C_4_3A	20	105000	93000		P4_C_4_3	20	117000	116000		P5_C_4_3	20	93700	95300
A_C_5_1	50	211000	108200		P1_C_5_1	50	232000	100000		P2_C_5_1	50	250000	112000		P3_C_5_1	50	224000	129000		P4_C_5_1	50	235000	104000		P5_C_5_1	50	256000	117000
A_C_5_2	50	210000	109300		P1_C_5_2	50	216000	100000		P2_C_5_2	50	196000	104300		P3_C_5_2	50	207000	124000		P4_C_5_2	50	227000	111000		P5_C_5_2	50	257000	124000
A_C_5_3	50	219000	108000		P1_C_5_3	50	234000	101000		P2_C_5_3	50	249000	120000		P3_C_5_3A	50	219000	106000		P4_C_5_3	50	276000	105000		P5_C_5_3	50	278000	122000
A_C_6_1	100	433000	113000		P1_C_6_1	100	601000	134000		P2_C_6_1	100	412000	83200		P3_C_6_1	100	389000	120000		P4_C_6_1	100	469000	122000		P5_C_6_1	100	420000	94700
A_C_6_2	100	446000	111000		P1_C_6_2	100	567000	134000		P2_C_6_2	100	366000	88800		P3_C_6_2	100	380000	117800		P4_C_6_2	100	544000	123000		P5_C_6_2	100	445000	94100
A_C_6_3	100	475000	112000		P1_C_6_3	100	575000	132000		P2_C_6_3	100	363000	82900		P3_C_6_3A	100	440000	106000		P4_C_6_3	100	598000	131000		P5_C_6_3	100	438000	94100
JWH250	Conc (ng/mL)	Area	IS Area		JWH250	Conc (ng/mL)	Area	IS Area		JWH250	Conc (ng/mL)	Area	IS Area		JWH250	Conc (ng/mL)	Area	IS Area		JWH250	Conc (ng/mL)	Area	IS Area		JWH250	Conc (ng/mL)	Area	IS Area
A_C_0_1	0	14500	76900		P1_C_0_1	0	14400	147000		P2_C_0_1	0	10500	136000		P3_C_0_1	0	8100	122000		P4_C_0_1	0	11600	128000		P5_C_0_1	0	8970	135000
A_C_0_2	0	15500	81600		P1_C_0_2	0	18300	147000		P2_C_0_2	0	11700	132000		P3_C_0_2	0	10600	125000		P4_C_0_2	0	8690	130000		P5_C_0_2	0	10200	128000
A_C_0_3	0	16500	86300		P1_C_0_3	0	9780	161000		P2_C_0_3	0	11700	145000		P3_C_0_3	0	10000	133000		P4_C_0_3	0	10400	131000		P5_C_0_3	0	9980	132000
A_C_1_1	1	176000	97300		P1_C_1_1	1	251000	122000		P2_C_1_1	1	225000	101000		P3_C_1_1	1	238000	125000		P4_C_1_1	1	194000	109000		P5_C_1_1	1	210000	114000
A_C_1_2	1	175500	88900		P1_C_1_2	1	259000	121000		P2_C_1_2	1	215000	102000		P3_C_1_2	1	235000	112000		P4_C_1_2	1	199000	103000		P5_C_1_2	1	210000	114900
A_C_1_3	1	164000	85400		P1_C_1_3	1	277000	124000		P2_C_1_3	1	224000	108000		P3_C_1_3	1	226000	122000		P4_C_1_3	1	201000	109000		P5_C_1_3	1	215000	112000
A_C_2_1	5	840000	100000		P1_C_2_1	5	1160000	135000		P2_C_2_1	5	1110000	134000		P3_C_2_1	5	1020000	111000		P4_C_2_1	5	853000	119000		P5_C_2_1	5	973000	109000
A_C_2_2	5	796500	103200		P1_C_2_2	5	1180000	129000		P2_C_2_2	5	1020000	120000		P3_C_2_2	5	1040000	104100		P4_C_2_2	5	913000	118000		P5_C_2_2	5	928000	98500
A_C_2_3	5	751000	99700		P1_C_2_3	5	1150000	134000		P2_C_2_3	5	1090000	142000		P3_C_2_3	5	984000	112000		P4_C_2_3	5	919000	119000		P5_C_2_3	5	898000	104000
A_C_3_1	10	1730000	104000		P1_C_3_1	10	2530000	135000		P2_C_3_1	10	2080000	110000		P3_C_3_1	10	2060000	114000		P4_C_3_1	10	1800000	109000		P5_C_3_1	10	1950000	117000
A_C_3_2	10	1670000	104000		P1_C_3_2	10	2590000	132000		P2_C_3_2	10	2020000	107000		P3_C_3_2	10	1930000	113000		P4_C_3_2	10	1940000	119000		P5_C_3_2	10	1930000	107200
A_C_3_3	10	1610000	99700		P1_C_3_3	10	2320000	130000		P2_C_3_3	10	2070000	103000		P3_C_3_3A	10	1600000	105000		P4_C_3_3	10	1960000	109000		P5_C_3_3	10	1960000	109000
A_C_4_1	20	3720000	100000		P1_C_4_1	20	5350000	128000		P2_C_4_1	20	4710000	106000		P3_C_4_1	20	4500000	114000		P4_C_4_1	20	4320000	116000		P5_C_4_1	20	4100000	94100
A_C_4_2	20	3890000	92200		P1_C_4_2	20	5320000	131000		P2_C_4_2	20	4750000	104300		P3_C_4_2	20	4550000	109500		P4_C_4_2	20	4330000	117000		P5_C_4_2	20	3910000	94500
A_C_4_3	20	3720000	95500		P1_C_4_3	20	5240000	133000		P2_C_4_3	20	4640000	109000		P3_C_4_3A	20	3500000	93000		P4_C_4_3	20	4300000	116000		P5_C_4_3	20	4030000	95300
A_C_5_1	50	8250000	108200		P1_C_5_1	50	10100000	100000		P2_C_5_1	50	10200000	112000		P3_C_5_1	50	11600000	129000		P4_C_5_1	50	9010000	104000		P5_C_5_1	50	9990000	117000
A_C_5_2	50	8170000	109300		P1_C_5_2	50	9630000	100000		P2_C_5_2	50	10200000	104300		P3_C_5_2	50	12300000	124000		P4_C_5_2	50	9420000	111000		P5_C_5_2	50	10000000	124000
A_C_5_3	50	8310000	108000		P1_C_5_3	50	9380000	101000		P2_C_5_3	50	10100000	120000		P3_C_5_3A	50	9600000	106000		P4_C_5_3	50	9230000	105000		P5_C_5_3	50	10500000	122000
A_C_6_1	100	16400000	113000		P1_C_6_1	100	20600000	134000		P2_C_6_1	100	15600000	83200		P3_C_6_1	100	14800000	120000		P4_C_6_1	100	18700000	122000		P5_C_6_1	100	16600000	94700
A_C_6_2	100	15900000	111000		P1_C_6_2	100	21000000	134000		P2_C_6_2	100	15900000	88800		P3_C_6_2	100	14600000	117800		P4_C_6_2	100	18100000	123000		P5_C_6_2	100	17000000	94100
A_C_6_3	100	15700000	112000		P1_C_6_3	100	20100000	132000		P2_C_6_3	100	16200000	82900		P3_C_6_3A	100	12900000	106000		P4_C_6_3	100	18400000	131000		P5_C_6_3	100	16900000	94100
C7	Conc (ng/mL)	Area	IS Area		C7	Conc (ng/mL)	Area	IS Area		C7	Conc (ng/mL)	Area	IS Area		C7	Conc (ng/mL)	Area	IS Area		C7	Conc (ng/mL)	Area	IS Area		C7	Conc (ng/mL)	Area	IS Area
A_C_0_1	0	2180	76900		P1_C_0_1	0	1280	147000		P2_C_0_1	0	539	136000		P3_C_0_1	0	692	122000		P4_C_0_1	0	524	128000		P5_C_0_1	0	676	135000
A_C_0_2	0	630	81600		P1_C_0_2	0	696	147000		P2_C_0_2	0	958	132000		P3_C_0_2	0	306	125000		P4_C_0_2	0	1710	130000		P5_C_0_2	0	2480	128000
A_C_0_3	0	503	86300		P1_C_0_3	0	538	161000		P2_C_0_3	0	296	145000		P3_C_0_3	0	1130	133000		P4_C_0_3	0	1530	131000		P5_C_0_3	0	1270	132000
A_C_1_1	1	666	97300		P1_C_1_1	1	1160	122000		P2_C_1_1	1	983	101000		P3_C_1_1	1	984	125000		P4_C_1_1	1	1470	109000		P5_C_1_1	1	1590	114000
A_C_1_2	1	965	88900		P1_C_1_2	1	1060	121000		P2_C_1_2	1	1133	102000		P3_C_1_2	1	729	112000		P4_C_1_2	1	1797	103000		P5_C_1_2	1	1280	114900
A_C_1_3	1	745	85400		P1_C_1_3	1	939	124000		P2_C_1_3	1	1420	108000		P3_C_1_3	1	668	122000		P4_C_1_3	1	2150	109000		P5_C_1_3	1	1320	112000
A_C_2_1	5	1090	100000		P1_C_2_1	5	2500	135000		P2_C_2_1	5	2870	134000		P3_C_2_1	5	2880	111000		P4_C_2_1	5	2540	119000		P5_C_2_1	5	3620	109000
A_C_2_2	5	1230	103200		P1_C_2_2	5	2870	129000		P2_C_2_2	5	2600	120000		P3_C_2_2	5	2160	104100		P4_C_2_2	5	2090	118000		P5_C_2_2	5	2650	98500
A_C_2_3	5	2310	99700		P1_C_2_3	5	2390	134000		P2_C_2_3	5	3680	142000		P3_C_2_3	5	2300	112000		P4_C_2_3	5	1930	119000		P5_C_2_3	5	2880	104000
A_C_3_1	10	3670	104000		P1_C_3_1	10	3900	135000		P2_C_3_1	10	3230	110000		P3_C_3_1	10	3640	114000		P4_C_3_1	10	4050	109000		P5_C_3_1	10	4050	117000
A_C_3_2	10	3020	104000		P1_C_3_2	10	4690	132000		P2_C_3_2	10	3570	107000		P3_C_3_2	10	3400	113000		P4_C_3_2	10	3440	119000		P5_C_3_2	10	4480	107200
A_C_3_3	10	2840	99700		P1_C_3_3	10	3700	130000		P2_C_3_3	10	3090	103000		P3_C_3_3A	10	3750	105000		P4_C_3_3	10	3840	109000		P5_C_3_3	10	4510	109000
A_C_4_1	20	6900	100000		P1_C_4_1	20	10600	128000		P2_C_4_1	20	7050	106000		P3_C_4_1	20	5750	114000		P4_C_4_1	20	5360	116000		P5_C_4_1	20	8380	94100
A_C_4_2	20	5740	92200		P1_C_4_2	20	9270	131000		P2_C_4_2	20	5810	104300		P3_C_4_2	20	5860	109500		P4_C_4_2	20	7840	117000		P5_C_4_2	20	6500	94500
A_C_4_3	20	7040	95500		P1_C_4_3	20	11100	133000		P2_C_4_3	20	7360	109000		P3_C_4_3A	20	6030	93000		P4_C_4_3	20	6170	116000		P5_C_4_3	20	6720	95300
A_C_5_1	50	14400	108200		P1_C_5_1	50	17600	100000		P2_C_5_1	50	17000	112000		P3_C_5_1	50	20700	129000		P4_C_5_1	50	16400	104000		P5_C_5_1	50	15700	117000
A_C_5_2	50	12000	109300		P1_C_5_2	50	17700	100000		P2_C_5_2	50	15800	104300		P3_C_5_2	50	18500	124000		P4_C_5_2	50	16900	111000		P5_C_5_2	50	16500	124000
A_C_5_3	50	14200	108000		P1_C_5_3	50	17100	101000		P2_C_5_3	50	16100	120000		P3_C_5_3A	50	22200	106000		P4_C_5_3	50	21400	105000		P5_C_5_3	50	16300	122000
A_C_6_1	100	26700	113000		P1_C_6_1	100	43200	134000		P2_C_6_1	100	26100	83200		P3_C_6_1	100	23700	120000		P4_C_6_1	100	34600	122000		P5_C_6_1	100	26700	94700
A_C_6_2	100	28000	111000		P1_C_6_2	100	39200	134000		P2_C_6_2	100	24900	88800		P3_C_6_2	100	24700	117800		P4_C_6_2	100	35700	123000		P5_C_6_2	100	26000	94100
A_C_6_3	100	29900	112000		P1_C_6_3	100	40300	132000		P2_C_6_3	100	25300	82900		P3_C_6_3A	100	28900	106000		P4_C_6_3	100	31500	131000		P5_C_6_3	100	25800	94100
C8	Conc (ng/mL)	Area	IS Area		C8	Conc (ng/mL)	Area	IS Area		C8	Conc (ng/mL)	Area	IS Area		C8	Conc (ng/mL)	Area	IS Area		C8	Conc (ng/mL)	Area	IS Area		C8	Conc (ng/mL)	Area	IS Area
A_C_0_1	0	7100	76900		P1_C_0_1	0	7480	147000		P2_C_0_1	0	7150	136000		P3_C_0_1	0	9090	122000		P4_C_0_1	0	7690	128000		P5_C_0_1	0	11200	135000
A_C_0_2	0	4910	81600		P1_C_0_2	0	8860	147000		P2_C_0_2	0	17700	132000		P3_C_0_2	0	9010	125000		P4_C_0_2	0	8230	130000		P5_C_0_2	0	12400	128000
A_C_0_3	0	11900	86300		P1_C_0_3	0	4350	161000		P2_C_0_3	0	8450	145000		P3_C_0_3	0	9730	133000		P4_C_0_3	0	10500	131000		P5_C_0_3	0	9910	132000
A_C_1_1	1	5880	97300		P1_C_1_1	1	7030	122000		P2_C_1_1	1	4710	101000		P3_C_1_1	1	5810	125000		P4_C_1_1	1	6320	109000		P5_C_1_1	1	8510	114000
A_C_1_2	1	6110	88900		P1_C_1_2	1	6370	121000		P2_C_1_2	1	4620	102000		P3_C_1_2	1	4940	112000		P4_C_1_2	1	6450	103000		P5_C_1_2	1	9290	114900
A_C_1_3	1	7750	85400		P1_C_1_3	1	6180	124000		P2_C_1_3	1	6480	108000		P3_C_1_3	1	4890	122000		P4_C_1_3	1	5680	109000		P5_C_1_3	1	9320	112000
A_C_2_1	5	13700	100000		P1_C_2_1	5	12200	135000		P2_C_2_1	5	10800	134000		P3_C_2_1	5	17700	111000		P4_C_2_1	5	5490	119000		P5_C_2_1	5	11700	109000
A_C_2_2	5	4755	103200		P1_C_2_2	5	12500	129000		P2_C_2_2	5	12600	120000		P3_C_2_2	5	6410	104100		P4_C_2_2	5	8970	118000		P5_C_2_2	5	10200	98500
A_C_2_3	5	7620	99700		P1_C_2_3	5	13300	134000		P2_C_2_3	5	13700	142000		P3_C_2_3	5	14100	112000		P4_C_2_3	5	8810	119000		P5_C_2_3	5	7280	104000
A_C_3_1	10	6730	104000		P1_C_3_1	10	10400	135000		P2_C_3_1	10	10100	110000		P3_C_3_1	10	9850	114000		P4_C_3_1	10	16300	109000		P5_C_3_1	10	8910	117000
A_C_3_2	10	10425	104000		P1_C_3_2	10	9980	132000		P2_C_3_2	10	9250	107000		P3_C_3_2	10	9230	113000		P4_C_3_2	10	15000	119000		P5_C_3_2	10	10200	107200
A_C_3_3	10	14000	99700		P1_C_3_3	10	10300	130000		P2_C_3_3	10	10700	103000		P3_C_3_3A	10	9370	105000		P4_C_3_3	10	12300	109000		P5_C_3_3	10	9930	109000
A_C_4_1	20	11900	100000		P1_C_4_1	20	13500	128000		P2_C_4_1	20	16200	106000		P3_C_4_1	20	16000	114000		P4_C_4_1	20	37200	116000		P5_C_4_1	20	14600	94100
A_C_4_2	20	7055	92200		P1_C_4_2	20	19300	131000		P2_C_4_2	20	20800	104300		P3_C_4_2	20	15400	109500		P4_C_4_2	20	19200	117000		P5_C_4_2	20	17500	94500
A_C_4_3	20	13700	95500		P1_C_4_3	20	16900	133000		P2_C_4_3	20	17400	109000		P3_C_4_3A	20	22700	93000		P4_C_4_3	20	13500	116000		P5_C_4_3	20	10700	95300
A_C_5_1	50	22800	108200		P1_C_5_1	50	20500	100000		P2_C_5_1	50	18800	112000		P3_C_5_1	50	27400	129000		P4_C_5_1	50	29500	104000		P5_C_5_1	50	22500	117000
A_C_5_2	50	19000	109300		P1_C_5_2	50	21000	100000		P2_C_5_2	50	17600	104300		P3_C_5_2	50	24000	124000		P4_C_5_2	50	26900	111000		P5_C_5_2	50	21900	124000
A_C_5_3	50	15500	108000		P1_C_5_3	50	23000	101000		P2_C_5_3	50	17800	120000		P3_C_5_3A	50	28800	106000		P4_C_5_3	50	25100	105000		P5_C_5_3	50	25600	122000
A_C_6_1	100	33000	113000		P1_C_6_1	100	29000	134000		P2_C_6_1	100	26800	83200		P3_C_6_1	100	25100	120000		P4_C_6_1	100	37500	122000		P5_C_6_1	100	30900	94700
A_C_6_2	100	29350	111000		P1_C_6_2	100	45900	134000		P2_C_6_2	100	40200	88800		P3_C_6_2	100	28900	117800		P4_C_6_2	100	43200	123000		P5_C_6_2	100	36000	94100
A_C_6_3	100	39000	112000		P1_C_6_3	100	54800	132000		P2_C_6_3	100	28300	82900		P3_C_6_3A	100	42700	106000		P4_C_6_3	100	39200	131000		P5_C_6_3	100	34400	94100
THCCOOH	Conc (ng/mL)	Area	IS Area		THCCOOH	Conc (ng/mL)	Area	IS Area		THCCOOH	Conc (ng/mL)	Area	IS Area		THCCOOH	Conc (ng/mL)	Area	IS Area		THCCOOH	Conc (ng/mL)	Area	IS Area		THCCOOH	Conc (ng/mL)	Area	IS Area
A_C_0_1	0	7680	76900		P1_C_0_1	0	9980	147000		P2_C_0_1	0	6940	136000		P3_C_0_1	0	5580	122000		P4_C_0_1	0	11400	128000		P5_C_0_1	0	8410	135000
A_C_0_2	0	6935	81600		P1_C_0_2	0	9390	147000		P2_C_0_2	0	11000	132000		P3_C_0_2	0	5640	125000		P4_C_0_2	0	7590	130000		P5_C_0_2	0	6850	128000
A_C_0_3	0	6840	86300		P1_C_0_3	0	9110	161000		P2_C_0_3	0	8770	145000		P3_C_0_3	0	3360	133000		P4_C_0_3	0	8680	131000		P5_C_0_3	0	9410	132000
A_C_1_1	1	11500	97300		P1_C_1_1	1	7910	122000		P2_C_1_1	1	10800	101000		P3_C_1_1	1	7020	125000		P4_C_1_1	1	10500	109000		P5_C_1_1	1	8200	114000
A_C_1_2	1	11050	88900		P1_C_1_2	1	11500	121000		P2_C_1_2	1	10200	102000		P3_C_1_2	1	8710	112000		P4_C_1_2	1	9210	103000		P5_C_1_2	1	8590	114900
A_C_1_3	1	9910	85400		P1_C_1_3	1	9980	124000		P2_C_1_3	1	14500	108000		P3_C_1_3	1	8100	122000		P4_C_1_3	1	8000	109000		P5_C_1_3	1	7600	112000
A_C_2_1	5	10600	100000		P1_C_2_1	5	14600	135000		P2_C_2_1	5	17400	134000		P3_C_2_1	5	13600	111000		P4_C_2_1	5	16200	119000		P5_C_2_1	5	14000	109000
A_C_2_2	5	10300	103200		P1_C_2_2	5	14600	129000		P2_C_2_2	5	13400	120000		P3_C_2_2	5	14200	104100		P4_C_2_2	5	13500	118000		P5_C_2_2	5	11100	98500
A_C_2_3	5	10100	99700		P1_C_2_3	5	13200	134000		P2_C_2_3	5	17100	142000		P3_C_2_3	5	14200	112000		P4_C_2_3	5	13000	119000		P5_C_2_3	5	12200	104000
A_C_3_1	10	23700	104000		P1_C_3_1	10	38500	135000		P2_C_3_1	10	36600	110000		P3_C_3_1	10	35200	114000		P4_C_3_1	10	28700	109000		P5_C_3_1	10	26800	117000
A_C_3_2	10	27550	104000		P1_C_3_2	10	34600	132000		P2_C_3_2	10	33400	107000		P3_C_3_2	10	28300	113000		P4_C_3_2	10	31500	119000		P5_C_3_2	10	23700	107200
A_C_3_3	10	25900	99700		P1_C_3_3	10	37600	130000		P2_C_3_3	10	39000	103000		P3_C_3_3A	10	40000	105000		P4_C_3_3	10	36800	109000		P5_C_3_3	10	34700	109000
A_C_4_1	20	64000	100000		P1_C_4_1	20	87100	128000		P2_C_4_1	20	77100	106000		P3_C_4_1	20	67300	114000		P4_C_4_1	20	56300	116000		P5_C_4_1	20	51700	94100
A_C_4_2	20	59900	92200		P1_C_4_2	20	79400	131000		P2_C_4_2	20	69100	104300		P3_C_4_2	20	58100	109500		P4_C_4_2	20	57000	117000		P5_C_4_2	20	56100	94500
A_C_4_3	20	54700	95500		P1_C_4_3	20	79800	133000		P2_C_4_3	20	74100	109000		P3_C_4_3A	20	61700	93000		P4_C_4_3	20	67400	116000		P5_C_4_3	20	62300	95300
A_C_5_1	50	122000	108200		P1_C_5_1	50	163000	100000		P2_C_5_1	50	175000	112000		P3_C_5_1	50	159000	129000		P4_C_5_1	50	133000	104000		P5_C_5_1	50	130000	117000
A_C_5_2	50	115000	109300		P1_C_5_2	50	157000	100000		P2_C_5_2	50	154000	104300		P3_C_5_2	50	156000	124000		P4_C_5_2	50	141000	111000		P5_C_5_2	50	133000	124000
A_C_5_3	50	124000	108000		P1_C_5_3	50	161000	101000		P2_C_5_3	50	165000	120000		P3_C_5_3A	50	158000	106000		P4_C_5_3	50	141000	105000		P5_C_5_3	50	145000	122000
A_C_6_1	100	261000	113000		P1_C_6_1	100	375000	134000		P2_C_6_1	100	333000	83200		P3_C_6_1	100	271000	120000		P4_C_6_1	100	290000	122000		P5_C_6_1	100	248000	94700
A_C_6_2	100	240000	111000		P1_C_6_2	100	363000	134000		P2_C_6_2	100	345000	88800		P3_C_6_2	100	251000	117800		P4_C_6_2	100	268000	123000		P5_C_6_2	100	236000	94100
A_C_6_3	100	237000	112000		P1_C_6_3	100	366000	132000		P2_C_6_3	100	326000	82900		P3_C_6_3A	100	212000	106000		P4_C_6_3	100	292000	131000		P5_C_6_3	100	248000	94100
UR144	Conc (ng/mL)	Area	IS Area		UR144	Conc (ng/mL)	Area	IS Area		UR144	Conc (ng/mL)	Area	IS Area		UR144	Conc (ng/mL)	Area	IS Area		UR144	Conc (ng/mL)	Area	IS Area		UR144	Conc (ng/mL)	Area	IS Area
A_C_0_1	0	2340	76900		P1_C_0_1	0	1380	147000		P2_C_0_1	0	2150	136000		P3_C_0_1	0	1980	122000		P4_C_0_1	0	2350	128000		P5_C_0_1	0	3190	135000
A_C_0_2	0	4025	81600		P1_C_0_2	0	1760	147000		P2_C_0_2	0	4870	132000		P3_C_0_2	0	2170	125000		P4_C_0_2	0	2040	130000		P5_C_0_2	0	2640	128000
A_C_0_3	0	3140	86300		P1_C_0_3	0	2050	161000		P2_C_0_3	0	1760	145000		P3_C_0_3	0	2190	133000		P4_C_0_3	0	2220	131000		P5_C_0_3	0	1740	132000
A_C_1_1	1	64000	97300		P1_C_1_1	1	87300	122000		P2_C_1_1	1	69100	101000		P3_C_1_1	1	90800	125000		P4_C_1_1	1	69800	109000		P5_C_1_1	1	70400	114000
A_C_1_2	1	64000	88900		P1_C_1_2	1	94400	121000		P2_C_1_2	1	73300	102000		P3_C_1_2	1	96400	112000		P4_C_1_2	1	69800	103000		P5_C_1_2	1	72300	114900
A_C_1_3	1	57000	85400		P1_C_1_3	1	84300	124000		P2_C_1_3	1	68200	108000		P3_C_1_3	1	90300	122000		P4_C_1_3	1	72300	109000		P5_C_1_3	1	71800	112000
A_C_2_1	5	302000	100000		P1_C_2_1	5	422000	135000		P2_C_2_1	5	375000	134000		P3_C_2_1	5	354000	111000		P4_C_2_1	5	324000	119000		P5_C_2_1	5	319000	109000
A_C_2_2	5	279000	103200		P1_C_2_2	5	417000	129000		P2_C_2_2	5	368000	120000		P3_C_2_2	5	361000	104100		P4_C_2_2	5	324000	118000		P5_C_2_2	5	329000	98500
A_C_2_3	5	284000	99700		P1_C_2_3	5	402000	134000		P2_C_2_3	5	355000	142000		P3_C_2_3	5	340000	112000		P4_C_2_3	5	336000	119000		P5_C_2_3	5	323000	104000
A_C_3_1	10	647000	104000		P1_C_3_1	10	934000	135000		P2_C_3_1	10	710000	110000		P3_C_3_1	10	704000	114000		P4_C_3_1	10	681000	109000		P5_C_3_1	10	687000	117000
A_C_3_2	10	612000	104000		P1_C_3_2	10	899000	132000		P2_C_3_2	10	698000	107000		P3_C_3_2	10	694000	113000		P4_C_3_2	10	732000	119000		P5_C_3_2	10	682000	107200
A_C_3_3	10	643000	99700		P1_C_3_3	10	843000	130000		P2_C_3_3	10	732000	103000		P3_C_3_3A	10	766000	105000		P4_C_3_3	10	747000	109000		P5_C_3_3	10	697000	109000
A_C_4_1	20	1500000	100000		P1_C_4_1	20	2000000	128000		P2_C_4_1	20	1620000	106000		P3_C_4_1	20	1670000	114000		P4_C_4_1	20	1270000	116000		P5_C_4_1	20	1410000	94100
A_C_4_2	20	1410000	92200		P1_C_4_2	20	1980000	131000		P2_C_4_2	20	1550000	104300		P3_C_4_2	20	1720000	109500		P4_C_4_2	20	1630000	117000		P5_C_4_2	20	1400000	94500
A_C_4_3	20	1430000	95500		P1_C_4_3	20	1890000	133000		P2_C_4_3	20	1590000	109000		P3_C_4_3A	20	1710000	93000		P4_C_4_3	20	1600000	116000		P5_C_4_3	20	1410000	95300
A_C_5_1	50	3440000	108200		P1_C_5_1	50	3710000	100000		P2_C_5_1	50	3530000	112000		P3_C_5_1	50	3400000	129000		P4_C_5_1	50	3420000	104000		P5_C_5_1	50	3690000	117000
A_C_5_2	50	3300000	109300		P1_C_5_2	50	3700000	100000		P2_C_5_2	50	3730000	104300		P3_C_5_2	50	3360000	124000		P4_C_5_2	50	3640000	111000		P5_C_5_2	50	3750000	124000
A_C_5_3	50	3310000	108000		P1_C_5_3	50	3470000	101000		P2_C_5_3	50	3620000	120000		P3_C_5_3A	50	3700000	106000		P4_C_5_3	50	3590000	105000		P5_C_5_3	50	3800000	122000
A_C_6_1	100	6830000	113000		P1_C_6_1	100	8700000	134000		P2_C_6_1	100	5570000	83200		P3_C_6_1	100	5690000	120000		P4_C_6_1	100	7120000	122000		P5_C_6_1	100	5930000	94700
A_C_6_2	100	6510000	111000		P1_C_6_2	100	8130000	134000		P2_C_6_2	100	5590000	88800		P3_C_6_2	100	5510000	117800		P4_C_6_2	100	7370000	123000		P5_C_6_2	100	6180000	94100
A_C_6_3	100	6630000	112000		P1_C_6_3	100	8230000	132000		P2_C_6_3	100	5640000	82900		P3_C_6_3A	100	6370000	106000		P4_C_6_3	100	7350000	131000		P5_C_6_3	100	6080000	94100

## Sheet: EXP Frezee_THAW
Sample	Name	Low time 1	Low time2	Low time3	Low time4	Low time5		Name	Name	Low time 1	Low time2	Low time3	Low time4	Low time5
P1L1	AM2201	135000	120000	106000	95000	82800		AM2201	AM2201	942000	1090000	836000	1070000	900000
P2L1	AM2201	106000	110000	114000	104000	94800		AM2201	AM2201 155	937000	1160000	842000	1010000	942000
P3L1	AM2201	142000	106000	113000	87100	72900		AM2201	AM2201 155	942000	973000	1120000	918000	702000
P4L1	AM2201	164000	98900	186000	106000	89600		AM2201	AM2201 155	993000	852000	955000	942000	834000
P5L1	AM2201	106000	118000	94600	108000	79400		AM2201	AM2201 155	1020000	811000	985000	942000	743000
P1L1	CBD	26800	32400	14800	48600	21400		CBD	CBD 193	251000	234000	190000	269000	241000
P2L1	CBD	44200	26800	28900	20200	13600		CBD	CBD 193	436000	241000	198000	244000	166000
P3L1	CBD	20800	32900	34800	26800	20400		CBD	CBD 193	372000	316000	241000	131000	127000
P4L1	CBD	67700	26800	40900	14100	15700		CBD	CBD 193	344000	297000	241000	143000	204000
P5L1	CBD	16400	35300	26800	31000	25500		CBD	CBD 193	220000	206000	270000	241000	315000
P1L1	CBN	51700	26900	60900	56200	40000		CBN	CBN 223	448000	287000	382000	478000	486000
P2L1	CBN	100000	51700	27500	62100	50600		CBN	CBN 223	470000	427000	448000	452000	426000
P3L1	CBN	53300	51700	76400	51300	44200		CBN	CBN 223	448000	376000	603000	425000	543000
P4L1	CBN	64000	40700	21100	51700	56300		CBN	CBN 223	474000	368000	448000	429000	454000
P5L1	CBN	29500	72000	35100	66900	51700		CBN	CBN 223	436000	448000	462000	379000	482000
P1L1	HU211	28000	32300	24400	22100	27200		HU211	HU211 243	202000	170000	181000	224000	254000
P2L1	HU212	31900	27200	21200	37000	23800		HU212	HU211 243	227000	169000	202000	225000	198000
P3L1	HU213	37900	33600	27200	21400	16200		HU213	HU211 243	234000	206000	202000	173000	115000
P4L1	HU214	16800	27200	27600	33800	21200		HU214	HU211 243	245000	183000	201000	202000	220000
P5L1	HU215	18600	35800	47600	22700	27200		HU215	HU211 243	203000	200000	202000	233000	182000
P1L1	JWH019	1790000	942000	1000000	2040000	1410000		JWH019	JWH019 155	10900000	8230000	9870000	12500000	11970000
P2L1	JWH020	1540000	1060000	504000	1670000	1410000		JWH020	JWH019 155	11450000	9750000	9590000	12840000	10900000
P3L1	JWH021	1410000	1200000	1110000	1600000	1640000		JWH021	JWH019 155	11150000	10900000	13670000	10700000	9070000
P4L1	JWH022	356000	1150000	1410000	1800000	1490000		JWH022	JWH019 155	10170000	9830000	10900000	11410000	11540000
P5L1	JWH023	282000	788000	1670000	1410000	1420000		JWH023	JWH019 155	9640000	10900000	13340000	11550000	10050000
P1L1	JWH081	1480000	920000	1190000	1800000	1380000		JWH081	JWH081 185	11800000	9640000	10580000	12550000	12460000
P2L1	JWH082	1470000	1210000	640000	1560000	1380000		JWH082	JWH081 185	11900000	11210000	10670000	12440000	11800000
P3L1	JWH083	1400000	1370000	989000	1600000	1380000		JWH083	JWH081 185	12890000	11260000	14640000	11800000	9860000
P4L1	JWH084	408000	1220000	1380000	1650000	1620000		JWH084	JWH081 185	11800000	11180000	12480000	11230000	12030000
P5L1	JWH085	377000	979000	1630000	1380000	1490000		JWH085	JWH081 185	10920000	11800000	14520000	12720000	10000000
P1L1	JWH122	1690000	1020000	1090000	1970000	1490000		JWH122	JWH122 169	12000000	9900000	10870000	14300000	13030000
P2L1	JWH123	1580000	1110000	611000	1760000	1490000		JWH123	JWH122 169	13460000	11710000	11050000	14120000	12000000
P3L1	JWH124	1490000	1390000	1180000	1740000	1720000		JWH124	JWH122 169	12720000	11870000	15180000	12000000	10010000
P4L1	JWH125	348000	1200000	1490000	1760000	1570000		JWH125	JWH122 169	12000000	10620000	11890000	12340000	13030000
P5L1	JWH126	369000	923000	1770000	1650000	1490000		JWH126	JWH122 169	11450000	12000000	15040000	12910000	10790000
P1L1	JWH200	451000	460000	477000	491000	404000		JWH200	JWH200 155	3920000	3800000	3320000	4430000	4270000
P2L1	JWH201	457000	528000	460000	483000	434000		JWH201	JWH200 155	3520000	3920000	3680000	5050000	4110000
P3L1	JWH202	516000	509000	460000	450000	423000		JWH202	JWH200 155	3980000	3580000	4720000	3920000	3280000
P4L1	JWH203	464000	379000	461000	460000	392000		JWH203	JWH200 155	3700000	3650000	4080000	3920000	3960000
P5L1	JWH204	436000	491000	460000	461000	386000		JWH204	JWH200 155	3790000	3920000	4540000	4190000	3410000
P1L	MEPH	386000	384000	353000	315000	338000		MEPH	MEPH 160	3740000	3830000	3110000	3330000	3160000
P2L1	MEPH	390000	385000	353000	344000	351000		MEPH	MEPH 160	3330000	3480000	2910000	3650000	2890000
P3L1	MEPH	393000	364000	342000	353000	335000		MEPH	MEPH 160	3330000	3280000	3380000	3450000	2720000
P4L1	MEPH	353000	356000	370000	307000	301000		MEPH	MEPH 160	3420000	3330000	3420000	3030000	3120000
P5L1	MEPH	394000	413000	353000	324000	310000		MEPH	MEPH 160	3360000	3330000	3760000	3010000	2610000
P1L1	THC	28000	23000	18000	27000	36000		THC	THC 193	232000	161000	206000	268000	263000
P2L1	THC	33000	21000	15000	30000	27000		THC	THC 193	254000	194000	200000	257000	232000
P3L1	THC	35000	23000	27000	32000	23000		THC	THC 193	227000	264000	317000	232000	192000
P4L1	THC	24000	21000	27000	52000	42000		THC	THC 193	276000	219000	227000	232000	288000
P5L1	THC	15000	16000	34000	28000	27000		THC	THC 193	198000	232000	248000	234000	219000
P1L1	THCCOOH	16000	18000	18000	17000	18000		THCCOOH	THCCOOH 193	161000	138000	158000	204000	182000
P2L1	THCCOOH	15000	21000	18000	18000	19000		THCCOOH	THCCOOH 193	161000	149000	156000	196000	200000
P3L1	THCCOOH	15000	18000	16000	21000	18000		THCCOOH	THCCOOH 193	161000	138000	205000	189000	154000
P4L1	THCCOOH	17000	18000	17000	21000	20000		THCCOOH	THCCOOH 193	141000	156000	192000	161000	167000
P5L1	THCCOOH	18000	22000	16000	17000	18000		THCCOOH	THCCOOH 193	132000	165000	192000	161000	161000
P1L1	UR144	519000	393000	374000	548000	417000		UR144	UR144 125	3650000	3700000	3510000	4050000	4080000
P2L1	UR145	553000	417000	335000	477000	347000		UR145	UR144 125	3700000	3870000	3230000	4340000	3180000
P3L1	UR146	424000	417000	410000	427000	405000		UR146	UR144 125	3700000	4010000	4540000	3560000	2640000
P4L1	UR147	299000	341000	469000	459000	417000		UR147	UR144 125	3870000	3440000	3560000	3700000	3940000
P5L1	UR148	301000	417000	531000	563000	363000		UR148	UR144 125	4230000	3450000	4200000	3700000	2830000

## Sheet: EXP Short thermal stability
		AM 2201		CBD		CBN		HU211		JWH019		JWH081		JWH122		JWH200		MEPH		THC		THCCOOH		UR144
	temperature	Environment	Fridge	Environment	Fridge	Environment	Fridge	Environment	Fridge	Environment	Fridge	Environment	Fridge	Environment	Fridge	Environment	Fridge	Environment	Fridge	Environment	Fridge	Environment	Fridge	Environment	Fridge
1	P1H0	525000	490000	849000	653000	503000	575000	568000	563000	627000	551000	597000	594000	697000	597000	567000	581000	660000	453000	768000	702000	313000	335000	532000	545000
2	P1H1	547000	478000	912000	441000	504000	573000	620000	567000	629000	456000	613000	463000	685000	464000	547000	488000	887000	590000	648000	417000	512000	396000	554000	493000
3	P1H2	695000	654000	955000	895000	502000	852000	794000	844000	777000	701000	659000	499000	842000	667000	561000	623000	978000	761000	534000	671000	545000	712000	756000	808000
4	P1H3	1050000	728000	1270000	598000	895000	740000	828000	780000	854000	824000	1030000	812000	814000	797000	958000	767000	1210000	824000	993000	750000	975000	758000	1160000	774000
5	P1H4	1110000	1160000	925000	989000	1050000	1320000	1070000	1040000	1330000	1270000	1150000	1260000	1300000	1250000	965000	1310000	1120000	1060000	1160000	1150000	947000	1240000	1130000	1190000
6	P1H5	1330000	1940000	1020000	1310000	1190000	1030000	1140000	1160000	1610000	1060000	1240000	1070000	1640000	1090000	1240000	1120000	1220000	1090000	1360000	1130000	1350000	1130000	1290000	1090000
7	P1H6	837000	1830000	929000	1450000	989000	1140000	1060000	1450000	1030000	1210000	859000	1190000	1040000	1200000	926000	1510000	738000	1130000	891000	1390000	937000	1700000	750000	1080000
8	P1H7	1710000	3730000	1860000	2310000	1450000	1460000	1710000	1700000	1660000	1430000	1440000	1400000	1660000	1580000	1770000	1720000	906000	1330000	1820000	1660000	1780000	1940000	1290000	1430000
9
10	P2H0	697000	703000	1310000	1260000	928000	932000	816000	850000	881000	888000	973000	952000	772000	818000	1020000	926000	1530000	1350000	855000	845000	735000	747000	948000	891000
11	P2H1	862000	977000	1250000	1130000	879000	1040000	1050000	1210000	903000	951000	880000	1000000	882000	957000	867000	958000	1310000	1340000	867000	983000	750000	872000	851000	950000
12	P2H2	1060000	867000	966000	791000	1130000	952000	921000	1020000	972000	840000	1040000	856000	1000000	927000	955000	834000	1420000	1110000	1060000	913000	945000	971000	993000	843000
13	P2H3	819000	907000	918000	1090000	863000	932000	904000	930000	866000	956000	880000	932000	790000	961000	911000	862000	993000	1060000	792000	973000	832000	913000	816000	939000
14	P2H4	942000	813000	608000	497000	1010000	802000	974000	869000	963000	933000	1060000	344000	949000	874000	845000	750000	849000	762000	1040000	732000	1100000	862000	1000000	1060000
15	P2H5	942000	1670000	603000	794000	875000	773000	963000	820000	1050000	817000	1060000	785000	949000	878000	1010000	1560000	891000	826000	933000	879000	1090000	1010000	1040000	741000
16	P2H6	988000	1340000	1180000	1020000	1020000	1020000	798000	954000	958000	1050000	911000	977000	942000	1110000	929000	990000	869000	798000	982000	971000	977000	1050000	936000	950000
17	P2H7	1310000	2750000	898000	867000	956000	1090000	968000	1060000	926000	1030000	890000	962000	942000	1060000	1150000	1000000	822000	800000	951000	1130000	939000	1070000	913000	945000
18
19	P3H0	1090000	966000	1950000	1300000	1550000	1370000	1580000	1260000	1100000	1080000	1560000	1540000	1240000	1200000	1390000	1380000	2090000	1760000	1430000	1130000	930000	981000	1770000	1880000
20	P3H1	1200000	859000	1700000	794000	1440000	1040000	1430000	883000	1210000	968000	1370000	1150000	1210000	951000	1060000	1010000	1490000	1190000	1470000	958000	1040000	935000	1180000	1070000
21	P3H2	1080000	918000	1820000	1040000	1080000	1050000	1270000	922000	1100000	1200000	1200000	1010000	1040000	1100000	934000	916000	1400000	1170000	1270000	967000	962000	949000	1070000	1210000
22	P3H3	811000	1880000	646000	965000	870000	1080000	896000	1080000	850000	916000	1040000	1000000	937000	933000	974000	842000	966000	988000	1000000	955000	1000000	912000	813000	951000
23	P3H4	706000	739000	1000000	673000	854000	756000	876000	993000	760000	977000	847000	814000	839000	958000	835000	802000	918000	866000	767000	716000	941000	1040000	702000	933000
24	P3H5	940000	1780000	861000	822000	1010000	672000	988000	661000	1030000	832000	818000	865000	947000	842000	918000	1130000	802000	896000	851000	894000	840000	909000	1070000	833000
25	P3H6	944000	734000	533000	1050000	560000	724000	435000	489000	567000	792000	640000	871000	630000	828000	950000	861000	500000	851000	759000	710000	745000	1010000	504000	870000
26	P3H7	805000	1670000	884000	919000	704000	846000	567000	962000	688000	832000	749000	888000	735000	860000	910000	968000	594000	883000	880000	929000	943000	935000	661000	846000
27
28	P4H0	800000	775000	995000	974000	857000	860000	938000	937000	965000	953000	1270000	1340000	1060000	1060000	724000	771000	1290000	1000000	913000	828000	649000	629000	1360000	1460000
29	P4H1	820000	820000	870000	825000	744000	955000	946000	677000	811000	919000	783000	978000	762000	882000	772000	947000	1190000	1010000	883000	851000	513000	761000	1070000	890000
30	P4H2	994000	925000	1200000	1380000	1190000	1210000	1160000	1120000	1070000	1040000	1130000	942000	1020000	966000	951000	877000	1420000	964000	1080000	995000	949000	864000	987000	979000
31	P4H3	765000	1390000	487000	944000	844000	955000	681000	947000	754000	948000	770000	942000	727000	975000	791000	952000	911000	928000	904000	1000000	836000	903000	669000	935000
32	P4H4	890000	959000	889000	774000	1030000	917000	1000000	881000	988000	936000	1030000	1070000	935000	904000	933000	927000	901000	876000	1130000	855000	938000	981000	897000	949000
33	P4H5	1150000	1270000	1060000	937000	1230000	828000	975000	845000	1250000	903000	1090000	878000	1220000	918000	1030000	1250000	973000	898000	1150000	889000	1180000	1180000	1140000	817000
34	P4H6	1170000	884000	628000	940000	838000	929000	823000	974000	908000	880000	851000	878000	860000	838000	951000	937000	671000	846000	862000	1010000	946000	1010000	747000	810000
35	P4H7	1450000	2520000	1070000	1080000	1080000	1190000	752000	1050000	919000	1040000	817000	921000	949000	1010000	1150000	1170000	703000	956000	971000	1150000	1050000	1180000	740000	971000
36
37	P5H0	974000	925000	1400000	1000000	1150000	1190000	1310000	1380000	534000	548000	1080000	1200000	956000	947000	1190000	1170000	1580000	1200000	788000	679000	859000	782000	1220000	1150000
38	P5H1	1000000	959000	1210000	1020000	1080000	1250000	1390000	1220000	1080000	1090000	1130000	1250000	1170000	1050000	1000000	938000	1610000	1290000	1040000	997000	944000	880000	1230000	1130000
39	P5H2	910000	917000	1460000	742000	985000	1030000	1040000	1150000	973000	1100000	890000	945000	1010000	1060000	867000	864000	1410000	1120000	1000000	850000	963000	1000000	1010000	1020000
40	P5H3	910000	1110000	734000	812000	828000	915000	929000	877000	978000	1040000	966000	939000	1000000	951000	946000	907000	994000	985000	955000	968000	918000	871000	977000	1110000
41	P5H4	780000	841000	722000	697000	928000	807000	955000	942000	951000	967000	947000	1020000	928000	922000	875000	946000	890000	899000	858000	896000	983000	1000000	874000	793000
42	P5H5	889000	889000	646000	886000	956000	754000	830000	865000	933000	917000	937000	908000	928000	937000	895000	954000	785000	862000	1050000	956000	1010000	859000	907000	805000
43	P5H6	1110000	1020000	1150000	1010000	814000	670000	725000	766000	848000	889000	749000	861000	888000	886000	1050000	880000	521000	861000	875000	971000	940000	1020000	868000	860000
44	P5H7	2050000	1820000	738000	998000	800000	969000	793000	942000	843000	903000	777000	866000	859000	883000	938000	1050000	547000	848000	929000	928000	908000	1020000	746000	847000
45
46
47	P1L0	58200	60100	176000	195000	126000	124000	121000	145000	60400	54600	85900	78900	64100	56500	100000	91500	140000	86600	110000	71800	157000	126000	100000	101000
48	P1L1	57200	98000	125000	156000	136000	60400	106000	103000	61000	82100	80100	105000	68100	90200	77300	102000	112000	107000	74300	63000	108000	89600	97800	100000
49	P1L2	73800	114000	112000	143000	85600	84300	140000	115000	95900	131000	115000	103000	96700	124000	78000	110000	150000	112000	102000	109000	120000	102000	76100	168000
50	P1L3	125000	56900	157000	81900	47300	105000	77900	47800	122000	69800	99300	74000	115000	65200	115000	54900	145000	66300	82000	103000	74700	45200	146000	55800
51	P1L4	112000	79400	98000	78500	75700	70100	62800	109000	75700	95700	79400	107000	73900	88300	70500	97600	69700	69900	100000	95300	144000	75200	82200	85000
52	P1L5	100000	116000	84600	43700	81900	107000	90000	102000	116000	116000	113000	134000	124000	122000	112000	143000	92900	107000	122000	128000	104000	179000	112000	114000
53	P1L6	150000	163000	99700	96000	175000	140000	106000	66400	136000	126000	152000	132000	146000	126000	158000	142000	100000	105000	156000	167000	82800	110000	125000	111000
54	P1L7	136000	428000	79900	116000	176000	124000	129000	113000	146000	149000	151000	164000	162000	154000	146000	156000	96800	119000	222000	208000	89600	114000	155000	164000
55
56	P2L0	112000	131000	223000	173000	182000	177000	181000	291000	126000	134000	143000	139000	130000	139000	144000	157000	264000	218000	145000	116000	98400	90400	138000	144000
57	P2L1	96000	127000	198000	162000	125000	108000	188000	149000	119000	107000	127000	113000	108000	111000	108000	117000	191000	154000	118000	113000	87200	75400	128000	131000
58	P2L2	100000	102000	169000	77000	134000	69800	74200	118000	111000	101000	109000	96100	110000	102000	95700	111000	161000	152000	86300	105000	99900	84000	112000	98800
59	P2L3	61800	108000	67800	135000	26100	152000	40800	80400	61300	116000	38700	100000	64000	115000	65300	93200	42600	106000	26700	97500	32400	108000	64200	101000
60	P2L4	192000	80400	79600	172000	94100	104000	110000	36200	106000	114000	103000	117000	107000	109000	89700	96200	110000	106000	118000	97200	163000	104000	114000	111000
61	P2L5	79100	98000	109000	59500	118000	114000	126000	139000	106000	105000	122000	112000	105000	103000	104000	101000	102000	105000	90900	133000	112000	145000	100000	118000
62	P2L6	159000	104000	84200	55600	76300	93600	37300	94300	91000	99200	93700	90700	88100	96600	127000	96200	91800	93600	140000	80500	129000	109000	84000	83000
63	P2L7	116000	220000	103000	71800	69300	90500	102000	92400	78200	85100	78300	81700	80300	91200	113000	113000	96700	87200	94200	107000	155000	129000	78500	77400
64
65	P3L0	86300	84900	155000	116000	149000	105000	165000	132000	142000	152000	152000	160000	135000	143000	96500	108000	220000	173000	128000	107000	190000	284000	112000	142000
66	P3L1	108000	117000	99000	118000	136000	118000	138000	122000	124000	129000	150000	130000	130000	117000	112000	119000	178000	122000	153000	98200	192000	89600	116000	181000
67	P3L2	104000	114000	202000	111000	53900	112000	113000	87900	139000	149000	109000	101000	121000	134000	101000	98200	145000	122000	109000	106000	90000	249000	114000	142000
68	P3L3	96200	98000	93600	101000	91700	132000	93500	158000	105000	105000	110000	107000	110000	103000	108000	122000	109000	116000	103000	106000	122000	102000	89200	105000
69	P3L4	161000	70000	97000	97000	110000	58800	70300	151000	104000	106000	103000	106000	102000	101000	97400	97700	103000	92000	98300	84600	83200	128000	100000	107000
70	P3L5	93100	199000	76100	46200	123000	107000	160000	90400	107000	97500	39100	90500	99800	89700	104000	104000	94700	96500	98700	81300	142000	110000	119000	85400
71	P3L6	109000	82000	113000	80000	102000	83800	32800	36000	87300	106000	88000	106000	85600	109000	117000	82500	65000	88600	119000	110000	66900	64800	69300	99500
72	P3L7	178000	212000	116000	121000	66800	67500	99000	62500	82000	91200	89500	90500	87000	92200	118000	118000	48400	93200	94400	111000	58300	93100	67200	89900
73
74	P4L0	109000	111000	111000	102000	98500	104000	130000	95300	108000	128000	91900	107000	99000	114000	109000	132000	170000	163000	87900	96800	639000	744000	130000	146000
75	P4L1	109000	109000	101000	82600	96400	122000	129000	103000	110000	110000	128000	126000	114000	123000	108000	126000	167000	139000	88600	97200	58500	121000	127000	138000
76	P4L2	103000	101000	119000	112000	143000	140000	112000	64000	106000	126000	108000	105000	110000	118000	111000	103000	145000	132000	98300	122000	158000	67700	110000	133000
77	P4L3	101000	72600	232000	57300	122000	108000	63000	115000	94200	102000	104000	108000	104000	98500	97900	101000	102000	103000	77900	131000	114000	136000	104000	83600
78	P4L4	90300	76900	67100	109000	82800	98800	123000	62600	113000	75800	108000	84700	108000	77900	97900	96500	110000	109000	114000	109000	97600	104000	108000	70400
79	P4L5	99600	230000	84000	170000	165000	72200	100000	109000	106000	123000	120000	109000	108000	122000	108000	109000	102000	98200	121000	103000	177000	102000	96800	121000
80	P4L6	127000	103000	125000	103000	113000	138000	37200	135000	80100	95000	83500	86800	87600	95200	104000	98000	63200	92700	120000	97200	68900	68800	92300	91500
81	P4L7	161000	226000	94000	118000	87000	103000	90500	142000	80600	95500	82300	87500	92500	90500	97900	110000	59600	94800	116000	120000	44000	108000	96100	72000
82
83	P5L0	108000	90000	142000	109000	139000	148000	131000	161000	123000	122000	139000	152000	109000	108000	113000	109000	174000	132000	113000	101000	244000	308000	113000	117000
84	P5L1	104000	104000	109000	116000	128000	111000	148000	169000	113000	106000	120000	113000	119000	110000	102000	110000	156000	130000	132000	126000	187000	55600	124000	123000
85	P5L2	123000	108000	135000	84000	134000	135000	104000	148000	126000	123000	109000	93800	126000	120000	112000	89100	141000	107000	127000	85400	97700	82400	134000	110000
86	P5L3	116000	85700	143000	122000	102000	135000	102000	100000	109000	113000	107000	120000	103000	110000	105000	105000	114000	105000	102000	130000	114000	116000	156000	112000
87	P5L4	100000	80300	103000	121000	64700	101000	108000	112000	103000	106000	94600	115000	109000	104000	99700	97600	98100	99100	102000	107000	95900	96400	99200	102000
88	P5L5	102000	186000	99000	95000	110000	85000	120000	21100	100000	102000	105000	98500	102000	98400	97000	116000	79400	108000	108000	122000	121000	92800	89000	98600
89	P5L6	100000	136000	82300	103000	60500	50800	26000	94700	96200	99300	85300	90200	99400	94300	107000	100000	68400	89800	100000	95000	81500	139000	93100	77500
90	P5L7	138000	227000	90000	67800	97100	86800	43500	55600	82600	100000	79400	95500	96100	104000	138000	107000	57400	86900	104000	105000	65300	256000	78100	90200

## Sheet: Foglio1
AM2201	Conc (ng/mL)	Area	IS Area	Conc (ng/mL)	Area	IS Area		AM2201	Conc (ng/mL)	Area	IS Area		AM2201	Conc (ng/mL)	Area	IS Area		AM2201	Conc (ng/mL)	Area	IS Area		AM2201	Conc (ng/mL)	Area	IS Area
A_C_0_1	0	10570	76900	0	4350	147000		P2_C_0_1	0	10160	136000		P3_C_0_1	0	4570	122000		P4_C_0_1	0	8410	128000		P5_C_0_1	0	9200	135000
A_C_0_2	0	8980	81600	0	10350	147000		P2_C_0_2	0	10630	132000		P3_C_0_2	0	5040	125000		P4_C_0_2	0	9550	130000		P5_C_0_2	0	10940	128000
A_C_0_3	0	10280	86300	0	4940	161000		P2_C_0_3	0	14450	145000		P3_C_0_3	0	7270	133000		P4_C_0_3	0	5500	131000		P5_C_0_3	0	10660	132000
A_C_1_1	1	167000	97300	1	226000	122000		P2_C_1_1	1	190000	101000		P3_C_1_1	1	212000	125000		P4_C_1_1	1	191000	109000		P5_C_1_1	1	187000	114000
A_C_1_2	1	126000	88900	1	236000	121000		P2_C_1_2	1	168000	102000		P3_C_1_2	1	193000	112000		P4_C_1_2	1	207000	103000		P5_C_1_2	1	188000	114900
A_C_1_3	1	135000	85400	1	205000	124000		P2_C_1_3	1	176000	108000		P3_C_1_3	1	210000	122000		P4_C_1_3	1	201000	109000		P5_C_1_3	1	169000	112000
A_C_2_1	5	754000	100000	5	1045000	135000		P2_C_2_1	5	910000	134000		P3_C_2_1	5	955000	111000		P4_C_2_1	5	840000	119000		P5_C_2_1	5	906000	109000
A_C_2_2	5	714000	103200	5	1055000	129000		P2_C_2_2	5	836000	120000		P3_C_2_2	5	972000	104100		P4_C_2_2	5	884000	118000		P5_C_2_2	5	812000	98500
A_C_2_3	5	718000	99700	5	1065000	134000		P2_C_2_3	5	951000	142000		P3_C_2_3	5	948000	112000		P4_C_2_3	5	874000	119000		P5_C_2_3	5	825000	104000
A_C_3_1	10	1520000	104000	10	2460000	135000		P2_C_3_1	10	1820000	110000		P3_C_3_1	10	1880000	114000		P4_C_3_1	10	1880000	109000		P5_C_3_1	10	1830000	117000
A_C_3_2	10	1540000	104000	10	2350000	132000		P2_C_3_2	10	1830000	107000		P3_C_3_2	10	2030000	113000		P4_C_3_2	10	2000000	119000		P5_C_3_2	10	1790000	107200
A_C_3_3	10	1470000	99700	10	2260000	130000		P2_C_3_3	10	1840000	103000		P3_C_3_3A	10	1650000	105000		P4_C_3_3	10	1850000	109000		P5_C_3_3	10	1700000	109000
A_C_4_1	20	3700000	100000	20	5350000	128000		P2_C_4_1	20	4250000	106000		P3_C_4_1	20	4620000	114000		P4_C_4_1	20	4450000	116000		P5_C_4_1	20	3730000	94100
A_C_4_2	20	3570000	92200	20	5190000	131000		P2_C_4_2	20	4310000	104300		P3_C_4_2	20	4560000	109500		P4_C_4_2	20	4450000	117000		P5_C_4_2	20	3760000	94500
A_C_4_3	20	3410000	95500	20	4880000	133000		P2_C_4_3	20	4250000	109000		P3_C_4_3A	20	3630000	93000		P4_C_4_3	20	4240000	116000		P5_C_4_3	20	3910000	95300
A_C_5_1	50	8160000	108200	50	9430000	100000		P2_C_5_1	50	9510000	112000		P3_C_5_1	50	12670000	129000		P4_C_5_1	50	9640000	104000		P5_C_5_1	50	9900000	117000
A_C_5_2	50	8670000	109300	50	9360000	100000		P2_C_5_2	50	9420000	104300		P3_C_5_2	50	12780000	124000		P4_C_5_2	50	10070000	111000		P5_C_5_2	50	10370000	124000
A_C_5_3	50	8370000	108000	50	9380000	101000		P2_C_5_3	50	9320000	120000		P3_C_5_3A	50	10170000	106000		P4_C_5_3	50	9650000	105000		P5_C_5_3	50	10180000	122000
A_C_6_1	100	17500000	113000	100	22200000	134000		P2_C_6_1	100	16100000	83200		P3_C_6_1	100	16900000	120000		P4_C_6_1	100	19800000	122000		P5_C_6_1	100	17000000	94700
A_C_6_2	100	16600000	111000	100	23200000	134000		P2_C_6_2	100	16200000	88800		P3_C_6_2	100	16000000	117800		P4_C_6_2	100	20800000	123000		P5_C_6_2	100	17000000	94100
A_C_6_3	100	17400000	112000	100	22400000	132000		P2_C_6_3	100	16400000	82900		P3_C_6_3A	100	13800000	106000		P4_C_6_3	100	20600000	131000		P5_C_6_3	100	17400000	94100
